# Supplementary material for: Paneth Cells Protect against Acute Pancreatitis via Modulating Gut Microbiota Dysbiosis
Source: PubMed Central journal article supplement (PMC9239092; doi:10.1128/msystems.01507-21), 2022-05-02
Supplement: reviewer-comments.pdf [file reviewer-comments.pdf]

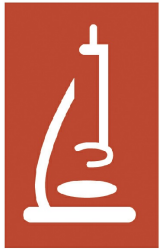

AMERICAN  
SOCIETY FOR  
MICROBIOLOGY

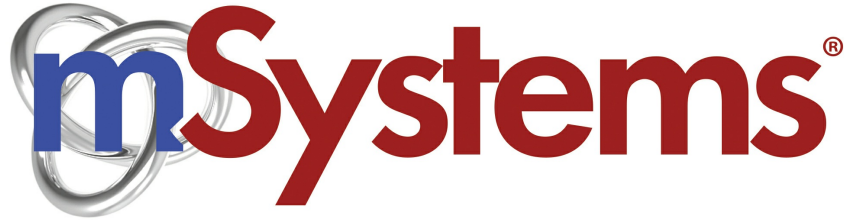

# Paneth cells protect against acute pancreatitis via modulating gut microbiota dysbiosis

Yang Fu, Qixiang Mei, Nuoming Yin, Zehua Huang, Baiwen Li, Shengzheng Luo, Binqiang Xu, Junjie Fan, Chunlan Huang, and Yue Zeng

*Corresponding Author(s): Yue Zeng, Shanghai General Hospital, Shanghai JiaoTong University School of Medicine*

---

## Review Timeline:

|                     |                   |
|---------------------|-------------------|
| Submission Date:    | December 22, 2021 |
| Editorial Decision: | February 2, 2022  |
| Revision Received:  | March 17, 2022    |
| Editorial Decision: | April 5, 2022     |
| Revision Received:  | April 6, 2022     |
| Accepted:           | April 8, 2022     |

---

*Editor: Chaysavanh Manichanh*

*Reviewer(s): Disclosure of reviewer identity is with reference to reviewer comments included in decision letter(s). The following individuals involved in review of your submission have agreed to reveal their identity: Kazuyuki Kasahara (Reviewer #2); PRADEEP BIST (Reviewer #3)*

## Transaction Report:

(Note: With the exception of the correction of typographical or spelling errors that could be a source of ambiguity, letters and reports are not edited. The original formatting of letters and referee reports may not be reflected in this compilation.)

**DOI: <https://doi.org/10.1128/msystems.01507-21>**

February 2, 2022

Dr. Yue Zeng  
Shanghai General Hospital, Shanghai JiaoTong University School of Medicine  
Shanghai  
China

Re: mSystems01507-21 (Paneth cell protect against acute pancreatitis via modulating gut microbiota dysbiosis)

Dear Dr. Yue Zeng:

Thank you for submitting your manuscript to mSystems. We have completed our review and I am pleased to inform you that, in principle, we expect to accept it for publication in mSystems. However, acceptance will not be final until you have adequately addressed the reviewer comments.

Thank you for the privilege of reviewing your work. Below you will find instructions from the mSystems editorial office and comments generated during the review.

### Preparing Revision Guidelines

To submit your modified manuscript, log onto the eJP submission site at <https://msystems.msubmit.net/cgi-bin/main.plex>. Go to Author Tasks and click the appropriate manuscript title to begin the revision process. The information that you entered when you first submitted the paper will be displayed. Please update the information as necessary. Here are a few examples of required updates that authors must address:

- Point-by-point responses to the issues raised by the reviewers in a file named "Response to Reviewers," NOT IN YOUR COVER LETTER.
- Upload a compare copy of the manuscript (without figures) as a "Marked-Up Manuscript" file.
- Each figure must be uploaded as a separate file, and any multipanel figures must be assembled into one file.
- Manuscript: A .DOC version of the revised manuscript
- Figures: Editable, high-resolution, individual figure files are required at revision, TIFF or EPS files are preferred

For complete guidelines on revision requirements, please see the journal Submission and Review Process requirements at <https://journals.asm.org/journal/mSystems/submission-review-process>. **Submission of a paper that does not conform to mSystems guidelines will delay acceptance of your manuscript.**

Corresponding authors may [join or renew ASM membership](#) to obtain discounts on publication fees. Need to upgrade your membership level? Please contact Customer Service at [Service@asmusa.org](mailto:Service@asmusa.org).

Thank you for submitting your paper to mSystems.

The ASM Journals program strives for constant improvement in our submission and publication process. Please tell us how we can improve your experience by taking this quick [Author Survey](#).

Sincerely,

Chaysavanh Manichanh

Editor, mSystems

Journals Department  
American Society for Microbiology  
1752 N St., NW  
Washington, DC 20036  
E-mail: [peerreview@asmusa.org](mailto:peerreview@asmusa.org)  
Phone: 1-202-942-9338

**Reviewer comments:**

Reviewer #1 (Comments for the Author):

In their paper Fu et al., use an acute pancreatitis mouse model to elucidate functional pathological changes in the ileum. 16s sequencing showed increases in pathogenic *Helicobacter* sp. Bacteria accompanied by decreased commensal *Blautia* sp. The administration of a lysozyme alleviated this shift in the gut microbial population and resulted in decreased clinical characteristics of intestinal pathology.

Overall, the study is well executed, and the findings are supported by the data. Some details remain to be addressed particularly regarding overall quantification of IF images before this work can be considered for publication:

1. It is difficult to see some of the panels perhaps have magnified insets for all focusing on a few cells to demonstrate representative staining. An example is the probe for bacterial endotoxin this is hardly visible.
2. What species of *Helicobacter* are most prevalent? Were the authors able to identify *H. pylori*? Perhaps I missed this information, but it would add value to discuss the diversity of *Helicobacter* as it could suggest a preferential shift towards one species during pancreatitis.
3. It would be helpful to know the gene expression changes in ileum Paneth cells in AP, AP+Dith, AP+Dith+lyso and Ctrl, using either bulk RNAseq of targeted sorted Paneth cells or scRNAseq or intestinal epithelium.
4. Please provide cellular quantification in addition to showing representative IF images. For example, in F3 how many cells are Claudin+/DAPI+ or Occludin+/DAPI+ across conditions. This should be performed across all IF images in all figures, for all conditions. It will help strengthen the conclusions.
5. Please provide quantification of all blots, and all blots should be at least n = 3. Also show whole blot images as a supplementary upload, even if the membrane was cut during imaging.
6. The biggest caveat of this study is the lack of mechanistic insight into how lysozyme is countering the effects of AP-induced ileal microbiome population restructuring. There is a complex interplay between the host ileal epithelium and microbiome that is not explained. However the reviewer understands that this is a work in progress, but outlining this caveat is important in the discussion section.
7. Were there any differences across sex?

Reviewer #2 (Comments for the Author):

The authors recently showed that ablation of Paneth cells exacerbates pancreatic and intestinal injuries and modulates intestinal microbiota in rats with acute pancreatitis (Guo Y et al, *Mediators Inflammation* 2019). In the current study, they investigated the role of gut microbiota - Paneth cells interactions in a mouse acute pancreatitis (AP) model. Firstly they found that patients with AP had decreased Paneth cells and lower expression of AMP (antimicrobial peptides) genes including lysosome, which was consistent with three mouse models of AP. They established a long-term (i.e., 15 days) reduction of Paneth cells in the L-arginine AP model, which showed increased pancreatic and ileal injuries, intestinal permeability, gut dysbiosis, and bacterial translocation. Moreover, they found that supplementation with lysozyme ameliorated those phenotypes induced by acute pancreatitis in mice and confirmed it in an enteroid model, suggesting that therapeutic interventions targeting Paneth cells provide new strategies for treatment of intestinal complications in AP. There have been enough experiments conducted to provide the conclusion, but there are some critical information missing in the manuscript. The following points should be clarified to prove.

Major concerns/questions:

- (1) There are several important information missing in the manuscript. i) experimental methods for the other two AP mouse models (i.e., caerulein+LPS and Na-taurocholate), ii) experimental protocol for antibiotics-treated mice, and iii) clinical trial number. BioProject reference number was provided but it looks like sequencing files are not uploaded in PRJNA774193.
- (2) QIIME was used to analyze 16s rRNA sequencing data, but it has not been updated anymore and replaced with QIIME2. Please reanalyze the data with QIIME2. And provide statistical methods used in the microbiome analysis.
- (3) Dithizone was used to deplete Paneth cells. What is the specificity of the drug? The reviewer thinks the reagent could directly affect the gut microbiome without changes of Paneth cells.
- (4) 200U/day of Lysozyme was supplemented to restore intestinal homeostasis. How did the authors determine the dosage? Any preliminary experiments performed?

Reviewer #3 (Comments for the Author):

"Paneth cell protect against acute pancreatitis via modulating gut microbiota dysbiosis" by Fu et al, claims to describe a mechanism through which the Paneth cells regulate gut microbiota during acute pancreatitis (AP). Using in vivo model, they made an original observation that the reduction in Paneth cells leads to a high risk of AP, and 16S rRNA sequencing revealed an altered gut microbiota landscape with increased abundance of pathogenic bacteria such as *Helicobacter* with decreased number of beneficial bacteria, *Blautia*. An imbalance of gut microbiota was found due to poor support for increased intestinal permeability and bacterial translocation, and this phenotype was reversed by supplementing one of the potent antimicrobial peptides

secreted by Paneth cells, lysozyme that played a pivotal role in establishing gut microbiome homeostasis. Mechanistically, they identified signaling molecules such as Wnt, Lgr5, and TGFbeta, important for this reversed phenotype. Furthermore, this study utilizes the organoid in vitro technique to strengthen their research findings. Overall, their transient model system indeed provides an insight into how the Paneth cell's function could be modulated against PA.

What was the source of lysozyme in this study? Would it be good to use the Lysozyme knock-out model to validate the observed phenotype in this study?

Is peritoneal administration of dithizone a more potent route of Paneth cells depletion than an intravenous method of choice?

Corrections-

Title: "Paneth cell protect against acute pancreatitis via modulating gut microbiota dysbiosis" change into "Paneth cells"

Page 2, line 41: remove % from 20 (20-30%)

Page 3, line 61: change "health" into healthy

Page 4, line 79: rephrase "in our study" to this study

Change 16s to 16S in full texts

Figures labeling has to be clearer

Figure S3B: Def to Def5 wherever applicable in the text, and MMP7, Cyrptidin1 panels are missing from the legend.

Page 10, line 189, correct (Figure 10 D-F) to (Figure 10 D)

line 192: mRNA expression of AMPs (lysozyme, Defa5, Spla2, Ang4) were also increased greatly ( $p < 0.05$ ) in Lyz group (Figure 10I, S4A-D): SPLA2 data is missing from the figure.

Figure 10F: Densitometric analysis may help to find the difference between Con to Lyz.

Figure 10J: What is the effect of Lyz on TNF-a, IL-6, or IL-1b expression?

Page 14, line 279: NS, "Mice" to mice

## Reviewer #1 (Comments for the Author):

In their paper Fu et al., use an acute pancreatitis mouse model to elucidate functional pathological changes in the ileum. 16s sequencing showed increases in pathogenic *Helicobacter* sp. Bacteria accompanied by decreased commensal *Blautia* sp. The administration of a lysozyme alleviated this shift in the gut microbial population and resulted in decreased clinical characteristics of intestinal pathology. Overall, the study is well executed, and the findings are supported by the data. Some details remain to be addressed particularly regarding overall quantification of IF images before this work can be considered for publication:

**1. It is difficult to see some of the panels perhaps have magnified insets for all focusing on a few cells to demonstrate representative staining. An example is the probe for bacterial endotoxin this is hardly visible.**

Thanks for pointing out the deficiency. We applied universal bacterial probe EUB338 to examine bacterial translocation in pancreas and small intestine. Similar fluorescent intensity was found in our study to those in several other studies (1-3). In our prior manuscript, bacterial translocation was illustrated by representative fluorescent photographs of pancreas (100× magnification) and ileum (200× magnification) and positive cells were counted for quantification. In revised version, we have appended local magnification of the typical positive staining to the upper right corner of the original pictures in Figure 4B, 4D, 8G, 8H to provide more detailed information.

**2. What species of helicobacter are most prevalent? Were the authors able to identify *H. pylori*? Perhaps I missed this information, but it would add value to discuss the diversity of helicobacter as it could suggest a preferential shift towards one species during pancreatitis.**

Thanks for the reviewer's constructive questions. In our study, 16S rRNA sequencing showed that long term reduction of Paneth cells greatly increased the relative abundance of *Helicobacter* and significantly reduced that of *Blautia* in AP. These changes were significantly reversed by lysozyme treatment. Studies have shown that *Helicobacter pylori*, *Helicobacter hepaticus*, *Helicobacter bilis* and *Helicobacter felis* are the most prevalent species associated with gastrointestinal inflammation in *Helicobacter.spp* (4). We carried out real time PCR for these four species to confirm the specific

changes of species in *Helicobacter.spp.*

Compared with Con group, level of *H. felis* and *H. hepaticus* increased significantly in Dith group, while level of *H. bilis* and *H. hepaticus* increased significantly in AP group. Compared with AP group, level of *H. bilis* and *H. felis* decreased and *H. hepaticus* increased significantly in Dith+AP group. Compared with Dith+AP group, level of *H. felis* increased greatly and level of *H. hepaticus* significantly decreased in Lyz+Dith+AP group. Although *H. pylori* has been reported to be associated with prolonged hospital stay in AP patients, it cannot be detected by real time PCR in contents of cecum (data not shown) in our research. These results has been added in **line 188-199** in the revised version (**Figure S3C**).

Based on the analysis of above results, the changes of *H. hepaticus* are of concern and warrants further study. *H. hepaticus* could exacerbated the severity of colitis via inducing inflammatory response, suggesting that it might be involved in intestinal inflammation of AP (5) (**line 272-274**).

We also added results of real time PCR of *Blautia obeum*, *Blautia coccooides* and *Bautia wexlerae* (most prevalent species in *Blautia*) in **line 188-199 (Figure S3C)** and discussion of possible beneficial role of *Blautia obeum* in AP in **line 274-276**.

**3. It would be helpful to know the gene expression changes in ileum Paneth cells in AP, AP+Dith, AP+Dith+lyso and Ctrl, using either bulk RNAseq of targeted sorted Paneth cells or sicRNAseq or intestinal epithelium.**

Thanks for the reviewer's valuable advice. The method of isolating Paneth cells was described in an article published in *Gastroenterology* in 2021. Briefly, isolated crypts were incubated with TrypLE Express supplement with DNase I (200 U/ml) and the centrifuged pellet was resuspended and incubated with CD24-PE Ab for 15 min for flow sorting (6). We prepared single cell suspension following the protocol and carried out flow cytometry. Unfortunately, we failed to isolate Paneth cells (data not shown) and bulk RNAseq for Paneth cells was not performed in our study. Due to the limitations on research funds, sicRNAseq of intestinal epithelium is beyond our current capability. Now, we are improving the method of isolation to better explore Paneth cells in AP and other gastrointestinal diseases.

**4. Please provide cellular quantification in addition to showing representative IF images. For example, in F3 how many cells are Claudin+/DAPI+ or Occludin+/DAPI+ across conditions. This should be performed across all IF images in all figures, for all conditions. It will help strengthen the conclusions.**

Thanks for the reviewer's advice. We have supplemented the quantitative analysis of all fluorescence images including **lysozyme staining** in Figure 1B, 1L, 10I, S2B; **Tunel staining** in 2L 7C, 7G; **EUB338 staining** in Figure 4C, 4E, 8G, 8H; **Claudin1 staining** in 3A, S4G; **ZO-1 staining** in 3B, S4G; **Occludin staining** in 3C, S4G; **PCNA staining** in 3J, 8C, 10D

**5. Please provide quantification of all blots, and all blots should be at least n = 3. Also show whole blot images as a supplementary upload, even if the membrane was cut during imaging.**

Thanks for the reviewer's valuable suggestion. Your rigorous academic attitudes are worth learning. We have supplemented the quantitative analysis of all blot (Figure S6A-B). All of original images have also been uploaded as part of the supplementary material (Figure S7).

**6. The biggest caveat of this study is the lack of mechanistic insight into how lysozyme is countering the effects of AP-induced ileal microbiome population restructuring. There is a complex interplay between the host ileal epithelium and microbiome that is not explained. However the reviewer understands that this is a work in progress, but outlining this caveat is important in the discussion section.**

Thanks for the reviewer's constructive suggestion. As you mentioned, there is a complicated interplay between the intestinal epithelium and microbiota. In our study, we focused on Paneth cell and its lysozyme. Lysozyme is a cornerstone of innate immunity, killing bacteria through the hydrolysis of peptidoglycan (PG) and its high cation (7, 8). Previous in vitro studies showed that lysozyme is a non-specific antimicrobial peptide, while different bacteria possessed distinct sensitivity to lysozyme (9-11). For instance, *Lactobacilli* was resistant to lysozyme, while *Dorea* was sensitive (12). In our study, changes of lysozyme are opposite to those of *Helicobacter.spp* and consistent with those of *Blautia.spp*. The relationship between lysozyme and two key genera needed to be verified by further in vitro experiments.

In addition to antimicrobial effect, lysozyme modulated innate immune responses. The sensing

of lysozyme-mediated production of pathogen-associated molecular patterns including PG and lipopolysaccharide by pattern recognition receptor stimulated downstream proinflammatory signaling and the production of proinflammatory cytokines (13, 14).

Lysozyme could also limit intestinal inflammation. Zhang et al showed that intestinal inflammation is associated with the failure of secretion of Paneth cell lysozyme in mouse model of Crohn's disease (15, 16). Furthermore, lysozyme supplement could ameliorate intestinal inflammation of porcine colitis (17). Mechanisms of lysozyme limiting intestinal inflammation was still unclear with speculation of limited bacterial invasion and activated protective intestinal immune response.

In revised manuscript, we outlined this caveat in **line 268-269, 279-286** in Discussion section.

#### **7. Were there any differences across sex?**

Thanks for the reviewer's question. In our study, we divided AP patients into two groups based on the course of disease to explore whether the changes of Paneth cells were associated with the course of AP. The Chi-square test on demographic data showed that there was no statistical difference in sex distribution among healthy controls, AP patients in early stage (< 72 h) and AP patients with onset time < 1 week ( $p = 0.31$ ) (in Supplementary Table1). Our research ultimately concluded that AP patients presented dysfunction of Paneth cells regardless of the course of the disease (the detailed results were shown in line 60-72).

We have also regrouped AP patients and healthy controls according to gender to analyze data as you suggested. The figures below illustrate that no significant difference was found in mRNA expression of antimicrobial peptides and stem cell supporting factors across sex in AP patients (data not included in manuscript).



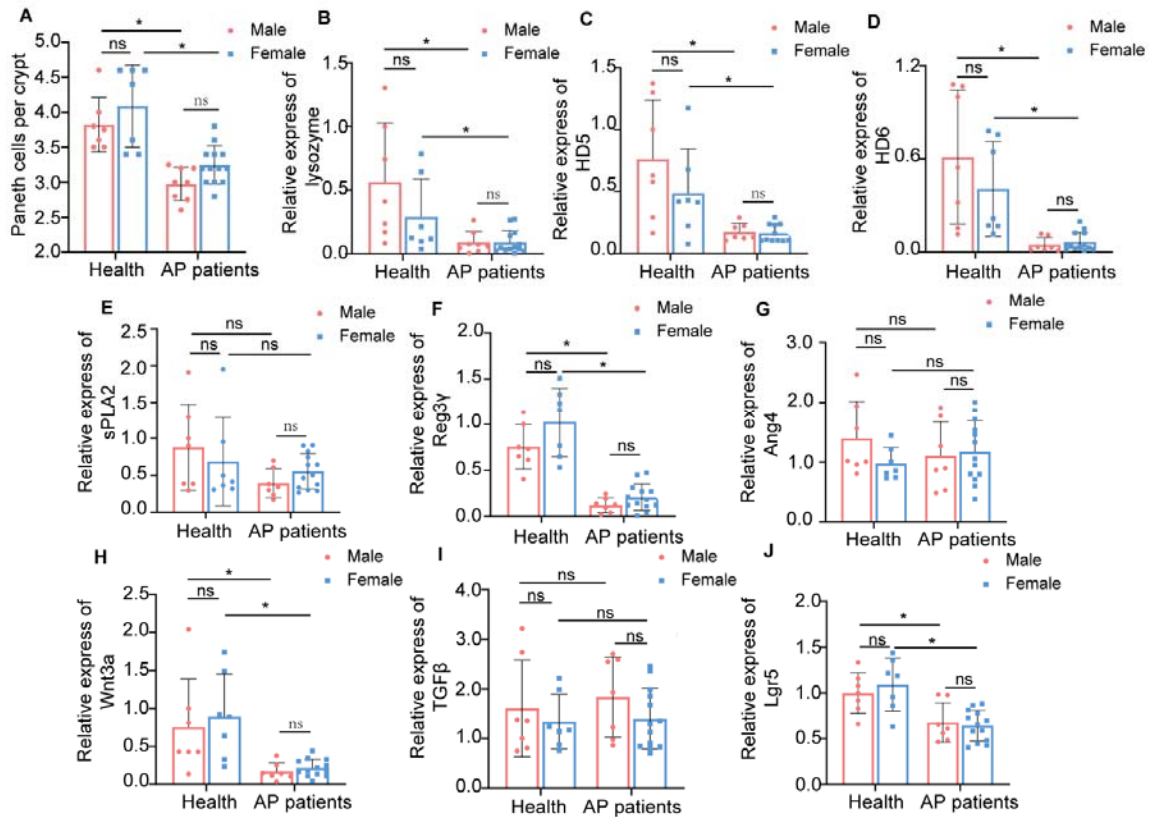

## Reviewer #2 (Comments for the Author):

The authors recently showed that ablation of Paneth cells exacerbates pancreatic and intestinal injuries and modulates intestinal microbiota in rats with acute pancreatitis (Guo Y et al, *Mediators Inflammation* 2019). In the current study, they investigated the role of gut microbiota - Paneth cells interactions in a mouse acute pancreatitis (AP) model. Firstly they found that patients with AP had decreased Paneth cells and lower expression of AMP (antimicrobial peptides) genes including

lysosome, which was consistent with three mouse models of AP. They established a long-term (i.e., 15 days) reduction of Paneth cells in the L-arginine AP model, which showed increased pancreatic and ileal injuries, intestinal permeability, gut dysbiosis, and bacterial translocation. Moreover, they found that supplementation with lysozyme ameliorated those phenotypes induced by acute pancreatitis in mice and confirmed it in an enteroid model, suggesting that therapeutic interventions targeting Paneth cells provide new strategies for treatment of intestinal complications in AP. There have been enough experiments conducted to provide the conclusion, but there are some critical information missing in the manuscript. The following points should be clarified to prove.

Major concerns/questions:

**(1) There are several important information missing in the manuscript. i) experimental methods for the other two AP mouse models (i.e., caerulein+LPS and Na-taurocholate), ii) experimental protocol for antibiotics-treated mice, and iii) clinical trial number. BioProject reference number was provided but it looks like sequencing files are not uploaded in PRJNA774193.**

Thanks for the reviewer's kind reminding. We were very sorry for missing several critical information. We have complemented the missing contents according to your suggestions.

i) Mice in Cae+AP group were injected intraperitoneally with 100 µg/kg caerulein (MedChemExpress, CN) ten times with an hour interval between consecutive injections. After final injection, 5 mg/kg lipopolysaccharide (Sigma-Aldrich, USA) was intraperitoneally injected. In N+AP group, 2 % sodium taurocholate (Sigma-Aldrich, USA) solution at a volume of 50 µl/20 g bodyweight was infused into the biliopancreatic duct at the speed of 5 µl/min to induce AP. These experimental methods for the two AP mouse models have been added in **line 314-319** in revised manuscript,;

ii) Feces was collected from Con mice, Dith mice and Dith+Lyz mice. The processing of FMT suspension was done within 2 hours. 100 mg feces was resuspended in 1 mL saline and centrifuged for 5 min. The supernatant was used as FMT suspension. The mice receiving antibiotics were treated with vancomycin (0.5 mg/mL), neomycin (1 mg/mL), ampicillin (1 mg/mL), and metronidazole (1 mg/mL) (Sangon Biotech, CN) in their drinking water for 4 weeks. Mice were divided into four groups: Con group, ABX+Con group, ABX+Dith group and ABX+Dith+Lyz group. Con group received no treatment. ABX+Con group were gavaged with feces from Con mice for 1 weeks,

ABX+Dith group were gavaged with 200µL FMT suspension from Dith mice for 1 weeks, and ABX+Dith+Lyz group were gavaged with 200µL FMT suspension from Dith+Lyz mice for 1 weeks. AP was induced in mice from ABX+Con group, ABX+Dith group and ABX+Dith+Lyz group. In revised manuscript, the experimental protocol for antibiotics-treated mice has been added in **line 389-398** in revised manuscript;

iii) Clinical trial number (ChiCTR1800017214) had been marked in Study Approval section (**line 440-441**).

iiii) Thanks for careful review. The data of 16S rRNA sequencing couldn't be downloaded because of some operational errors. National Center for Biotechnology Information (NCBI) staff had assisted us in releasing the data. We have confirmed that the data could be downloaded. If necessary, the reviewer could check the data in BioProject PRJNA774193.

**(2) QIIME was used to analyze 16s rRNA sequencing data, but it has not been updated anymore and replaced with QIIME2. Please reanalyze the data with QIIME2. And provide statistical methods used in the microbiome analysis.**

Thanks for the reviewer's constructive suggestion. The original data has been reanalyzed by QIIME2. **Principal coordinate analysis (PCoA)** of Con group, Dith group, AP group and Dith+AP group is in **line 119-122 (Figure 5E)**, **Alpha diversity** in **line 122-126 (Figure 5F-H)** and **linear discriminant analysis (LDA)** in **line 133-136 (Figure 6A-B)**.

**PCoA** of Dith+AP group and Lyz+Dith+AP group is in **line 179-180 (Figure 9F)**, **Alpha diversity** in **line 180-182 (Figure 9G-I)** and **LDA** in **line 185-187 (Figure 9K)**.

Statistical methods used in the microbiome analysis have also been updated in the part of Materials and Methods (**line 406-418**).

**(3) Dithizone was used to deplete Paneth cells. What is the specificity of the drug? The reviewer thinks the reagent could directly affect the gut microbiome without changes of Paneth cells.**

Thanks for the reviewer's question. Dithizone could combine with metal zinc ions to form chelates which had been proved to selectively induce the death of zinc-containing cells in vivo (18). Mitsutaka et al confirmed that intravenous dithizone specifically depleted Paneth cells in the

duodenum and ileum without affecting adjacent crypt base columnar cells (19). Since then, the method of using dithizone to deplete Paneth cells had been widely applied in the study of various diseases, such as necrotizing enterocolitis (NEC), alcoholic steatohepatitis, acute pancreatitis, liver ischemia-reperfusion injury and so on (20-23). By far, no study showed dithizone had a direct effect on intestinal microbiota. Leuschow et al used intraperitoneal injection of dithizone/diphtheria toxin to deplete Paneth cells and induced mouse NEC model respectively. The changes of gut microbiota in dithizone group exhibited a similar trend to that in diphtheria toxin group indicating that dithizone/diphtheria toxin affected the gut microbiota by depleting Paneth cells (24). In our further research, the uncertainty could be interpreted by using mice lacking Paneth cells.

**(4) 200U/day of Lysozyme was supplemented to restore intestinal homeostasis. How did the authors determine the dosage? Any preliminary experiments performed?**

Thanks for the reviewer's question. The dose of lysozyme is based on the literature published in *Gastroenterology* which confirmed that oral administration of 240 U/day could prevent *Escherichia coli* expansion and visceral hypersensitivity during maternal separation (25). Accordingly, 200 U/day lysozyme were gavaged to mice in Lyz+Dith+AP group for two weeks in our study. Significantly reversed severity of AP aggravated by long-term reduction of Paneth cells and restored dysbiosis of intestinal microbiota were found after lysozyme gavage. Therefore, preliminary experiments had not been arranged in our study with limitation of budget.

**Reviewer #3 (Comments for the Author):**

"Paneth cell protect against acute pancreatitis via modulating gut microbiota dysbiosis" by Fu et al, claims to describe a mechanism through which the Paneth cells regulate gut microbiota during acute pancreatitis (AP). Using in vivo model, they made an original observation that the reduction in Paneth cells leads to a high risk of AP, and 16S rRNA sequencing revealed an altered gut microbiota landscape with increased abundance of pathogenic bacteria such as *Helicobacter* with decreased number of beneficial bacteria, *Blautia*. An imbalance of gut microbiota was found due to poor support for increased intestinal permeability and bacterial translocation, and this phenotype was

reversed by supplementing one of the potent antimicrobial peptides secreted by Paneth cells, lysozyme that played a pivotal role in establishing gut microbiome homeostasis. Mechanistically, they identified signaling molecules such as Wnt, Lgr5, and TGFbeta, important for this reversed phenotype. Furthermore, this study utilizes the organoid in vitro technique to strengthen their research findings. Overall, their transient model system indeed provides an insight into how the Paneth cell's function could be modulated against PA.

**What was the source of lysozyme in this study? Would it be good to use the Lysozyme knock-out model to validate the observed phenotype in this study?**

Thanks for the reviewer's question. In our research, we used lysozyme from chicken egg white (L6876, Sigma, USA) (line 305) referred to the study published in *Gastroenterology*.

Lyz1<sup>-/-</sup> mice had been used to demonstrate lysozyme could generate ligands to modulate Nod2 activation and regulated the intestinal inflammatory response (12, 26). The application of knockout mice might further verify the critical role of lysozyme in AP. However, due to the limitations of budget and objective conditions, Lyz1<sup>-/-</sup> mice were not used in our study.

Supplementation of α-defensin5 effectively altered gut dysbiosis induced by Paneth cell dysfunction in alcoholic hepatitis (21). Lysozyme supplementation prevented *Escherichia coli* expansion caused by Paneth cell defect during maternal isolation (25). Lysozyme could also ameliorate intestinal inflammation of colitis (17). Therefore, we speculated that supplementation of lysozyme could attenuate gut dysbiosis induced by long term reduction of Paneth cells and alleviate intestinal inflammation of AP. Our study ultimately showed lysozyme significantly reduced the severity of AP.

**Is peritoneal administration of dithizone a more potent route of Paneth cells depletion than an intravenous method of choice?**

Thanks for the reviewer's question. The mechanism that dithizone selectively depleted Paneth cells was that it could bind with zinc ions to form zinc chelate which leads to cell death (19). Intraperitoneal and intravenous injection of dithizone are both widely recognized and deplete Paneth cells effectively. In the latest ten articles depletion of Paneth cells by dithizone in mice with doses ranged from 33 mg/kg to 100 mg/kg, nine studies chose intraperitoneal injection (20, 21, 24, 27-33). Moreover, our previous study showed rats injected with dithizone (100 mg/kg body weight) via the

tail vein were associated with high mortality rate (34). Therefore, we ultimately chose intraperitoneal injection of dithizone in our study.

#### Corrections-

Title: "Paneth cell protect against acute pancreatitis via modulating gut microbiota dysbiosis" change into "Paneth cells"

Page 2, line 41: remove % from 20 (20-30%)

Page 3, line 61: change "health" into healthy

Page 4, line 79: rephrase "in our study" to this study

Change 16s to 16S in full texts

Figures labeling has to be clearer

Figure S3B: Def to Def5 wherever applicable in the text, and MMP7, Cyrptidin1 panels are missing from the legend.

Page 10, line 189, correct (Figure 10 D-F) to (Figure 10 D)

line 192: mRNA expression of AMPs (lysozyme, Defa5, Spla2, Ang4) were also increased greatly ( $p < 0.05$ ) in Lyz group (Figure 10I, S4A-D): SPLA2 data is missing from the figure.

Figure 10F: Densitometric analysis may help to find the difference between Con to Lyz.

Figure 10J: What is the effect of Lyz on TNF- $\alpha$ , IL-6, or IL-1 $\beta$  expression?

Page 14, line 279: NS, "Mice" to mice

We thank the distinguished reviewer for careful review of our manuscript. We've corrected all mistakes or insufficiencies you mentioned above. Lysozyme treatment did not change the expression of inflammatory factors (TNF- $\alpha$ , IL-6, or IL-1 $\beta$ ) in enteroids. We added the comparison of inflammatory factors between Con group and Lyz group in Figure 10J.

## Reference

1. Li X, He C, Li N, Ding L, Chen H, Wan J, Yang X, Xia L, He W, Xiong H, Shu X, Zhu Y, Lu N. 2020. The interplay between the gut microbiota and NLRP3 activation affects the severity of acute pancreatitis in mice. *Gut Microbes* 11:1774-1789.
2. Wang L, Fouts DE, Stärkel P, Hartmann P, Chen P, Llorente C, DePew J, Moncera K, Ho SB, Brenner DA, Hooper LV, Schnabl B. 2016. Intestinal REG3 Lectins Protect against Alcoholic Steatohepatitis by Reducing Mucosa-Associated Microbiota and Preventing Bacterial Translocation. *Cell Host Microbe* 19:227-39.
3. Wen W, Zheng H, Jiang Y, Huang L, Li D, Zhang J, Zhang D. 2017. Effect of intestinal epithelial autophagy on bacterial translocation in severe acute pancreatitis. *Clin Res Hepatol Gastroenterol* 41:703-710.
4. Smet A, Menard A. 2020. Review: Other Helicobacter species. *Helicobacter* 25 Suppl 1:e12744.
5. Zhu L, Zhu C, Cao S, Zhang Q. 2021. Helicobacter hepaticus Induce Colitis in Male IL-10(-/-) Mice Dependent by Cytolethal Distending Toxin B and via the Activation of Jak/Stat Signaling Pathway. *Front Cell Infect Microbiol* 11:616218.
6. Lu R, Zhang YG, Xia Y, Zhang J, Kaser A, Blumberg R, Sun J. 2021. Paneth Cell Alertness to Pathogens Maintained by Vitamin D Receptors. *Gastroenterology* 160:1269-1283.
7. Zhang X, Jiang A, Yu H, Xiong Y, Zhou G, Qin M, Dou J, Wang J. 2016. Human Lysozyme Synergistically Enhances Bactericidal Dynamics and Lowers the Resistant Mutant Prevention

- Concentration for Metronidazole to *Helicobacter pylori* by Increasing Cell Permeability. *Molecules* 21.
8. Callewaert L, Michiels CW. 2010. Lysozymes in the animal kingdom. *J Biosci* 35:127-60.
  9. Ellison RT, 3rd, Giehl TJ. 1991. Killing of gram-negative bacteria by lactoferrin and lysozyme. *J Clin Invest* 88:1080-91.
  10. Ragland SA, Criss AK. 2017. From bacterial killing to immune modulation: Recent insights into the functions of lysozyme. *PLoS Pathog* 13:e1006512.
  11. Laible NJ, Germaine GR. 1985. Bactericidal activity of human lysozyme, muramidase-inactive lysozyme, and cationic polypeptides against *Streptococcus sanguis* and *Streptococcus faecalis*: inhibition by chitin oligosaccharides. *Infect Immun* 48:720-8.
  12. Yu S, Balasubramanian I, Laubitz D, Tong K, Bandyopadhyay S, Lin X, Flores J, Singh R, Liu Y, Macazana C, Zhao Y, Béguet-Crespel F, Patil K, Midura-Kiela MT, Wang D, Yap GS, Ferraris RP, Wei Z, Bonder EM, Häggblom MM, Zhang L, Douard V, Verzi MP, Cadwell K, Kiela PR, Gao N. 2020. Paneth Cell-Derived Lysozyme Defines the Composition of Mucolytic Microbiota and the Inflammatory Tone of the Intestine. *Immunity* 53:398-416.e8.
  13. Wolf AJ, Arruda A, Reyes CN, Kaplan AT, Shimada T, Shimada K, Arditi M, Liu G, Underhill DM. 2011. Phagosomal degradation increases TLR access to bacterial ligands and enhances macrophage sensitivity to bacteria. *J Immunol* 187:6002-10.
  14. Caruso R, Warner N, Inohara N, Núñez G. 2014. NOD1 and NOD2: signaling, host defense, and inflammatory disease. *Immunity* 41:898-908.
  15. Zhang Q, Pan Y, Yan R, Zeng B, Wang H, Zhang X, Li W, Wei H, Liu Z. 2015. Commensal bacteria direct selective cargo sorting to promote symbiosis. *Nat Immunol* 16:918-26.
  16. Wang H, Zhang X, Zuo Z, Zhang Q, Pan Y, Zeng B, Li W, Wei H, Liu Z. 2017. Rip2 Is Required for



Nod2-Mediated Lysozyme Sorting in Paneth Cells. *J Immunol* 198:3729-3736.

17. Lee M, Kovacs-Nolan J, Yang C, Archbold T, Fan MZ, Mine Y. 2009. Hen egg lysozyme attenuates inflammation and modulates local gene expression in a porcine model of dextran sodium sulfate (DSS)-induced colitis. *J Agric Food Chem* 57:2233-40.
18. Okamoto K. 1955. Experimental pathology of diabetes mellitus. II. *Tohoku J Exp Med* 61:1-116.
19. Sawada M, Takahashi K, Sawada S, Midorikawa O. 1991. Selective killing of Paneth cells by intravenous administration of dithizone in rats. *Int J Exp Pathol* 72:407-21.
20. McElroy SJ, Castle SL, Bernard JK, Almohazey D, Hunter CJ, Bell BA, Al Alam D, Wang L, Ford HR, Frey MR. 2014. The ErbB4 ligand neuregulin-4 protects against experimental necrotizing enterocolitis. *Am J Pathol* 184:2768-78.
21. Zhong W, Wei X, Hao L, Lin TD, Yue R, Sun X, Guo W, Dong H, Li T, Ahmadi AR, Sun Z, Zhang Q, Zhao J, Zhou Z. 2020. Paneth Cell Dysfunction Mediates Alcohol-related Steatohepatitis Through Promoting Bacterial Translocation in Mice: Role of Zinc Deficiency. *Hepatology* 71:1575-1591.
22. Guo Y, Huang C, Liu L, Fu X, Lu Y, Zheng J, Mei Q, Huang Z, Fan J, Lu L, Zeng Y. 2019. Paneth Cell Ablation Aggravates Pancreatic and Intestinal Injuries in a Rat Model of Acute Necrotizing Pancreatitis after Normal and High-Fat Diet. *Mediators Inflamm* 2019:8474523.
23. Grootjans J, Hodin CM, de Haan JJ, Derikx JP, Rouschop KM, Verheyen FK, van Dam RM, Dejong CH, Buurman WA, Lenaerts K. 2011. Level of activation of the unfolded protein response correlates with Paneth cell apoptosis in human small intestine exposed to ischemia/reperfusion. *Gastroenterology* 140:529-539.e3.
24. Lueschow SR, Stumphy J, Gong H, Kern SL, Elgin TG, Underwood MA, Kalanetra KM, Mills DA, Wong MH, Meyerholz DK, Good M, McElroy SJ. 2018. Loss of murine Paneth cell function alters the

immature intestinal microbiome and mimics changes seen in neonatal necrotizing enterocolitis. *PLoS One* 13:e0204967.

25. Riba A, Olier M, Lacroix-Lamandé S, Lencina C, Bacquié V, Harkat C, Gillet M, Baron M, Sommer C, Mallet V, Salvador-Cartier C, Laurent F, Théodorou V, Ménard S. 2017. Paneth Cell Defects Induce Microbiota Dysbiosis in Mice and Promote Visceral Hypersensitivity. *Gastroenterology* 153:1594-1606.e2.
26. Wang H, Shen X, Zheng X, Pan Y, Zhang Q, Liu Z. 2021. Intestinal lysozyme releases Nod2 ligand(s) to promote the intestinal mucosal adjuvant activity of cholera toxin. *Sci China Life Sci* 64:1720-1731.
27. Zhang C, Sherman MP, Prince LS, Bader D, Weitkamp JH, Slaughter JC, McElroy SJ. 2012. Paneth cell ablation in the presence of *Klebsiella pneumoniae* induces necrotizing enterocolitis (NEC)-like injury in the small intestine of immature mice. *Dis Model Mech* 5:522-32.
28. Fernandez MI, Regnault B, Mulet C, Tanguy M, Jay P, Sansonetti PJ, Pédrón T. 2008. Maturation of paneth cells induces the refractory state of newborn mice to *Shigella* infection. *J Immunol* 180:4924-30.
29. Berger JN, Gong H, Good M, McElroy SJ. 2019. Dithizone-induced Paneth cell disruption significantly decreases intestinal perfusion in the murine small intestine. *J Pediatr Surg* 54:2402-2407.
30. Lueschow SR, Kern SL, Gong H, Grobe JL, Segar JL, Carlson SJ, McElroy SJ. 2020. Feeding Formula Eliminates the Necessity of Bacterial Dysbiosis and Induces Inflammation and Injury in the Paneth Cell Disruption Murine NEC Model in an Osmolality-Dependent Manner. *Nutrients* 12.
31. White JR, Gong H, Pope B, Schlievert P, McElroy SJ. 2017. Paneth-cell-disruption-induced necrotizing enterocolitis in mice requires live bacteria and occurs independently of TLR4 signaling. *Dis Model Mech* 10:727-736.

32. Chaaban H, Burge K, Eckert J, Keshari RS, Silasi R, Lupu C, Warner B, Escobedo M, Caplan M, Lupu F. 2021. Neutrophil extracellular trap inhibition increases inflammation, bacteraemia and mortality in murine necrotizing enterocolitis. *J Cell Mol Med* 25:10814-10824.
33. Park SW, Kim M, Brown KM, D'Agati VD, Lee HT. 2011. Paneth cell-derived interleukin-17A causes multiorgan dysfunction after hepatic ischemia and reperfusion injury. *Hepatology* 53:1662-75.
34. Liu L, Guo Y, Zheng J, Lu Y, Shen Y, Huang C, Zeng Y, Wang X. 2019. Paneth cell ablation increases the small intestinal injury during acute necrotizing pancreatitis in rats. *Mol Med Rep* 20:473-484.

April 5, 2022

Dr. Yue Zeng  
Shanghai General Hospital, Shanghai JiaoTong University School of Medicine  
Shanghai  
China

Re: mSystems01507-21R1 (Paneth cells protect against acute pancreatitis via modulating gut microbiota dysbiosis)

Dear Dr. Yue Zeng:

Thank you for submitting your manuscript to mSystems. We have completed our review and I am pleased to inform you that, in principle, we expect to accept it for publication in mSystems. However, acceptance will not be final until you have adequately addressed reviewer #3 comments.

Thank you for the privilege of reviewing your work. Below you will find instructions from the mSystems editorial office and comments generated during the review.

### Preparing Revision Guidelines

To submit your modified manuscript, log onto the eJP submission site at <https://msystems.msubmit.net/cgi-bin/main.plex>. Go to Author Tasks and click the appropriate manuscript title to begin the revision process. The information that you entered when you first submitted the paper will be displayed. Please update the information as necessary. Here are a few examples of required updates that authors must address:

- Point-by-point responses to the issues raised by the reviewers in a file named "Response to Reviewers," NOT IN YOUR COVER LETTER.
- Upload a compare copy of the manuscript (without figures) as a "Marked-Up Manuscript" file.
- Each figure must be uploaded as a separate file, and any multipanel figures must be assembled into one file.
- Manuscript: A .DOC version of the revised manuscript
- Figures: Editable, high-resolution, individual figure files are required at revision, TIFF or EPS files are preferred

ASM policy requires that data be available to the public upon online posting of the article, so please verify all links to sequence records, if present, and make sure that each number retrieves the full record of the data. If a new accession number is not linked or a link is broken, provide production staff with the correct URL for the record. If the accession numbers for new data are not publicly accessible before the expected online posting of the article, publication of your article may be delayed; please contact the ASM production staff immediately with the expected release date.

For complete guidelines on revision requirements, please see the journal Submission and Review Process requirements at <https://journals.asm.org/journal/mSystems/submission-review-process>. **Submission of a paper that does not conform to mSystems guidelines will delay acceptance of your manuscript.**

Corresponding authors may [join or renew ASM membership](#) to obtain discounts on publication fees. Need to upgrade your membership level? Please contact Customer Service at [Service@asmusa.org](mailto:Service@asmusa.org).

Thank you for submitting your paper to mSystems.

The ASM Journals program strives for constant improvement in our submission and publication process. Please tell us how we can improve your experience by taking this quick [Author Survey](#).

Sincerely,

Chaysavanh Manichanh

Editor, mSystems

Journals Department  
American Society for Microbiology  
1752 N St., NW  
Washington, DC 20036

E-mail: peerreview@asmusa.org  
Phone: 1-202-942-9338

**Reviewer comments:**

Reviewer #1 (Comments for the Author):

The authors have sufficiently:

1. Applied correct analytical models to study statistical differences in cellular populations.
- 2) Added new novel data in relation to their study to look at *Helicobacter* sp. opening up new avenues of study.
- 3) Outlined limitations owing to technical and funding limitations, which is a part of ongoing science.

The authors have therefore sufficiently addressed my concerns. Any typographical errors including syntax, missing references, and grammatical deficiencies can be handled by the handling editor and typesetting editors of this journal.

Reviewer #2 (Comments for the Author):

The reviewer carefully read the responses to the review comment and the revised manuscript. All concerns have been addressed and it is acceptable for publication. Congratulations!

Reviewer #3 (Comments for the Author):

The authors have taken enough care to improve the manuscript by providing the required information. However, there are minor grammatic errors that need to be taken into consideration. The changes are highlighted in the manuscript (pdf version).

1 **Paneth cells protect against acute pancreatitis via modulating gut microbiota dysbiosis**

2 Yang Fu<sup>1,2\*</sup>, Qixiang Mei<sup>1,2\*</sup>, Nuoming Yin<sup>1,2\*</sup>, Zehua Huang<sup>1,2</sup>, Baiwen Li<sup>2</sup>, Shengzheng Luo<sup>2</sup>, Binqiang

3 Xu<sup>1,2</sup>, Junjie Fan<sup>2</sup>, Chunlan Huang<sup>1,2</sup>, Yue Zeng<sup>1,2</sup>

4 1. Shanghai Key Laboratory of Pancreatic Disease, Shanghai JiaoTong University School of Medicine,  
5 Shanghai 201600, China

6 2. Department of Gastroenterology, Shanghai General Hospital, Shanghai JiaoTong University School of  
7 Medicine, Shanghai 201600, China

8 \*These authors contributed equally to this work.

9 Corresponding author: Yue Zeng, Chunlan Huang, Junjie Fan, Department of Gastroenterology,  
10 Shanghai General Hospital, Shanghai JiaoTong University School of Medicine, Shanghai 201600,  
11 China; E-mail: [carrie\\_1004@sjtu.edu.cn](mailto:carrie_1004@sjtu.edu.cn), [huangchl@hotmail.com](mailto:huangchl@hotmail.com) and [956937215@qq.com](mailto:956937215@qq.com)

12

13

14

15

16

17

18

19

20

21

## 22 Abstract

23 Acute pancreatitis (AP) was usually accompanied by intestinal failure, but its mechanism was still  
24 unclear. In AP patients, functions of Paneth cells (lysozyme, HD5, Reg3 $\gamma$  and Wnt3a) decreased.  
25 Compared with AP mice, injuries and inflammations of pancreas and ileum were aggravated in Dithizone  
26 (Dith) +AP mice. Intestinal permeability and bacteria translocation were also increased. 16S rRNA  
27 sequencing showed that gut microbiota of Dith mice and Dith+AP mice exhibited a markedly increase in  
28 pathogenic bacteria *Helicobacter* and a significant~~ly~~ decrease in probiotics *Blautia*. Lysozyme gavage in  
29 Dith+AP mice effectively alleviated injuries of the pancreas and small intestine. The beneficial effect of  
30 lysozyme was associated with a significant~~ly~~ increase in probiotics *Blautia* and a virtual~~ly~~ absence of  
31 pathogenic bacteria *Helicobacter*. The severity of AP in antibiotics treated (ABX) mice was significantly  
32 aggravated when receiving feces from Dith mice and was markedly alleviated when receiving feces from  
33 lysozyme gavaged mice. In vitro, lysozyme increased the proliferation of enteroids by promoting  
34 activation of the Wnt pathway and Lgr5 expression of intestinal stem cells.

## 35 Importance

36 We demonstrated that AP patients and experimental AP mice exhibited dysfunction of Paneth cells.  
37 Our in vivo research showed that the severity of AP was exacerbated by long term dysfunction of Paneth  
38 cells which was associated with gut microbiota disorder. Restoring part of Paneth cell function through  
39 lysozyme supplementation alleviated the severity of AP and gut microbiota dysbiosis. This study provided  
40 a novel insight into a link of pancreas-gut interaction in the pathogenesis of AP, providing a new direction  
41 for clinical treatment of intestinal complications during AP.

## 42 Keywords

43 acute pancreatitis; Paneth cell; gut microbiota; lysozyme; intestinal enteroid

#### 44 **Introduction**

45 Acute pancreatitis (AP) is one of the most common gastrointestinal diseases requiring urgent  
46 hospitalization (1). Approximately 20-30% of patients develop severe acute pancreatitis (SAP) with a  
47 substantial mortality rate of 20-40% (2). The translocation of intestinal bacteria and endotoxin after  
48 intestinal barrier injury is a key event leading to SAP (3). A growing number of studies revealed that  
49 intestinal microecology alteration is related to the development of AP, which includes microbiota dysbiosis,  
50 intestinal barrier damage, and immunological dysfunction (3-6). But mechanisms have not yet been well  
51 understood and require further elucidation.

52 Paneth cells are highly differentiated secretory cells in the intestinal epithelium (7). They are  
53 distributed in the intestinal crypts and play an important role in the intestinal barrier. These cells secrete  
54 antimicrobial peptides (AMPs) such as lysozyme and  $\alpha$ -defensin to maintain the homeostasis of the  
55 intestinal environment (8, 9). Paneth cells also serve as guardians of intestinal stem cells via providing  
56 essential cytokines such as Wnt3a and TGF $\beta$  (10). Its abnormality is related to the progression of a variety  
57 of diseases (11-13). Our previous study proved that transient ablation of Paneth cell by dithizone (Dith)  
58 aggravated pancreatic and intestinal injuries in rat AP (14). An interaction exists between gut microbiota  
59 and Paneth cells. Mice lacking intestinal Sox9 protein presented an absence of Paneth cells accompanied  
60 by an increase of *Bacteroidetes* and *Enterococcus* and a decrease of *Bifidobacterium* (15). While gut  
61 microbiota regulates Paneth cell number and functions (16).

62 In this study, we explored the role of gut microbiota regulated by Paneth cells in AP and the potential  
63 therapeutic effects of lysozyme on AP by in vivo and in vitro experiments.



## 64 Results

65 **Dysfunction of Paneth cells in AP patients and experimental AP mice.** We collected duodenal  
66 mucosa specimens through endoscopy from 21 AP patients and 14 healthy controls. AP patients were  
67 divided into two groups based on the course of the disease to explore whether the changes of Paneth cells  
68 were associated with the course of AP. No demographic differences were found among the three groups  
69 (Table S1). Compared with healthy controls, Paneth cell counting and protein expression of lysozyme in  
70 duodenal were significantly decreased ( $p < 0.05$ ) in AP patients in **early-early-stage** (< 72 h) or with onset  
71 time < 1 week (Figure 1A-B). AP patients in **early-early-stage** had lower ( $p < 0.05$ ) mRNA expression of  
72 lysozyme, human defensin (HD) 5, HD6, and regenerating islet-derived (Reg) 3 $\gamma$ , Wnt3a, and Lgr5 than  
73 those in healthy controls (Figure 1C-H). Significantly reduced mRNA expression ( $p < 0.05$ ) of lysozyme,  
74 HD5, HD6, Reg3 $\gamma$ , and Wnt3a were also found in AP patients with onset time < 1 week (Figure 1C-H).  
75 However, compared with healthy controls, the expression of angiogenin 4 (Ang4), secretory  
76 phospholipase A2 (sPLA2), and TGF $\beta$  did not change greatly no matter how long the disease lasted (Figure  
77 1I-K). Therefore, dysfunctions of Paneth cells were detected in AP patients regardless of the course of the  
78 disease.

79 We applied three classical mouse models of AP, which were **the** L-arginine model (L-AP),  
80 caerulein+LPS model (Cae-AP) and Na-taurocholate model (N-AP) to further validate these findings.  
81 Compared with control (Con) mice, the number of Paneth cells in crypts and expression of lysozyme  
82 decreased significantly ( $p < 0.05$ ) in three AP models (Figure 1L-M). Lysozyme,  $\alpha$ -defensin5 (Defa5),  
83 Reg3 $\gamma$ , Wnt3a, Lgr5, and TGF $\beta$  were reduced at **the** mRNA level (Figure S1A-B).

84 **Long term reduction of Paneth cells aggravated AP-induced injuries, inflammation and**

85 **bacterial translocation.** In our previous study, rats were treated intraperitoneally with 100 mg/kg dithzone  
86 to ablate Paneth cells for 48 h (14). In this study, by increasing the frequency of injection and adjusting  
87 the dose of dithzone, the number of Paneth cells in mice intestinal crypts and expression of lysozyme and  
88 Defa5 decreased approximately to ~~one~~one-half of original levels for two weeks (Figure S2A-E). AP was  
89 induced by L-arginine on the basis of ~~long~~long-term reduction of Paneth cells (Figure S2A). Pancreatic  
90 pathological injuries and inflammation, amylase level, and pancreatic wet to dry (W/D) weight ratio of  
91 Dith+AP mice reached the highest level at 3 day following AP induction and were more severe ( $p < 0.05$ )  
92 than those of AP mice (Figure 2A-D). Therefore, we chose 3 day as the optimal time for subsequent  
93 experiments.

94 Dith+AP mice also exhibited more severe ileal pathological injuries ( $p < 0.05$ ) and more robust  
95 increases ( $p < 0.05$ ) of serum and ileal proinflammatory cytokines (TNF- $\alpha$ , IL-6 and IL-1 $\beta$ ) compared  
96 with AP mice (Figure 2E-K). Tunel staining showed that long term reduction of Paneth cells caused more  
97 ileal apoptosis ( $p < 0.05$ ) in Dith+AP mice (Figure 2L). Compared with AP mice, the expression of tight  
98 junction proteins (TJPs) (claudin1, occludin and ZO-1) decreased in Dith+AP mice (Figure 3A-D). Serum  
99 diamine oxidase (DAO) and D-lactate levels were also higher in Dith+AP mice than those in AP mice ( $p$   
100  $< 0.05$ ), suggesting increased intestinal permeability (Figure 3E).

101 It has been proved that Paneth cells constituted the niche for Lgr5<sup>+</sup> stem cells in intestinal crypts by  
102 secreting Wnt3a, TGF $\beta$ , etc (10). Compared with AP mice, the expression of Wnt3a, TGF $\beta$  and Lgr5 were  
103 significantly down-regulated ( $p < 0.05$ ) in Dith+AP mice (Figure 3F-I). Proliferating cell nuclear antigen  
104 (PCNA) staining showed that the reduction of Paneth cells inhibited the proliferation of intestinal  
105 epithelial cells (IECs) in Dith+AP mice (Figure 3J).

106 The progression of AP involves an increase in bacterial translocation caused by the disrupted  
107 intestinal barriers. Dith+AP mice harbored a higher level of endotoxin ( $p < 0.05$ ) than AP mice (Figure  
108 4A). Compared with AP mice, no bacterial translocation was found in Dith mice, while Dith+AP mice  
109 presented increased bacterial translocation to intestinal mucosa and pancreas using fluorescence in situ  
110 hybridization (FISH) analysis (Figure 4B-E). The amount of anaerobic bacteria in liver and mesenteric  
111 lymph nodes ~~was~~were counted through a brain heart infusion agar (BHIA) plate. Compared with AP mice,  
112 Dith+AP mice had more ~~e~~colony-colony-forming units (CFUs) ( $p < 0.05$ ), indicating that liver and  
113 mesenteric lymph nodes of Dith+AP mice had more severe bacterial translocation (Figure 4F-G).

114 **The aggravation of AP in Dith mice was related to the disturbance of intestinal microbiota.** To  
115 explore the role of the gut microbiota in exacerbated injuries and inflammation of Dith+AP mice, we  
116 transplanted the fecal microbiota of Dith mice and Con mice to antibiotics treated (ABX) mice followed  
117 by induction of AP. Compared with those of ABX mice receiving feces from Con mice, pathological  
118 damage and mRNA expression levels of TNF- $\alpha$ , IL-6 and IL-1 $\beta$  were increased significantly ( $p < 0.05$ ) in  
119 both pancreatic and ileal tissues of ABX mice receiving feces from Dith mice (Figure 5A-D).

120 We then analyzed the cecal contents by 16S rRNA sequencing. Principal coordinate analysis (PCoA)  
121 showed that the intestinal microbiota of AP mice ~~were~~was largely separated from that of Con mice.  
122 Simultaneously, different bacterial communities were revealed between Con mice and Dith mice. There  
123 was a partial overlap between bacterial communities in Dith and Dith+AP mice (Figure 5E). Compared  
124 with Con mice, alpha diversity of bacterial communities was greatly decreased in Dith mice reflected by  
125 decreased ~~shannon~~Shannon index ( $p < 0.05$ ) and increased ~~simpson~~Simpson index ( $p < 0.05$ ) (Figure 5F-  
126 H). Compared with AP mice, alpha diversity was also markedly decreased in Dith+AP mice evidenced by

127 decreased ~~shannon-Shannon~~ index, chao1 index, and increased ~~simpson-Simpson~~ index (Figure 5F-H).

128 *Firmicutes* and *Bacteroidetes* are two dominant bacteria at the phylum level (17). An increase of ~~the~~  
129 relative abundance of *Firmicutes* and a decrease of relative abundance of *Bacteroidetes* resulted in an  
130 increase of *Firmicutes/Bacteroidetes* (F/B) ratio ( $p < 0.05$ ) in Dith mice and Dith+AP mice (Figure 5I-J,  
131 S3A). The relative abundance of *Proteobacteria*, which includes *Escherichia-shigella*, *Helicobacter* and  
132 other pathogenic bacteria (18), also tended to increase in Dith mice and Dith+AP mice ( $p < 0.05$ ) (Figure  
133 5I-J).

134 Then we performed linear discrimination analysis coupled with effect size (LEfSe) on gut microbiota  
135 between Con mice and Dith mice with or without AP. At ~~the~~ genus level, the relative abundance of  
136 *Bacteroides* and *Helicobacter* increased significantly ( $p < 0.05$ ), while the relative abundance of *Blautia*  
137 decreased markedly in Dith mice and Dith+AP mice ( $p < 0.05$ ) (Figure 6A-B). Spearman's correlation  
138 analysis showed that the relative abundance of *Helicobacter* are positively correlated with levels of ~~a~~  
139 pancreatic and ileal histopathological score, serum DAO and D-lactate, serum proinflammatory cytokines  
140 and pancreatic MPO. In contrast, the relative abundance of *Blautia* ~~were-was~~ negatively associated with  
141 ~~an~~ ileal histopathological score, serum IL-6, pancreatic MPO, and endotoxin (Figure 6C).

142 **Lysozyme ameliorated AP-induced injuries and inflammation in Dith mice.** Functional recovery  
143 of Paneth cell has been reported to effectively correct intestinal dysbiosis (19). We next evaluated the  
144 therapeutic potential of AMPs of Paneth cells in AP mice. Compared with AP mice, the mRNA expression  
145 of lysozyme, Defa5, Reg3 $\gamma$ , Reg3 $\beta$ , Ang4, cryptdin1 in Dith+AP mice decreased significantly ( $p < 0.05$ ),  
146 while the mRNA expression of MMP7 and sPLA2 were ~~not~~ significant changes (Figure S4A). The protein  
147 expression of lysozyme, Defa5, and Ang4 were down-regulated in Dith+AP mice (Figure S4B, S6A).

148 Spearman's correlation analysis revealed that the severity of AP was inversely associated with the levels  
149 of Paneth cell AMPs, where lysozyme harbored the highest correlation coefficient (Figure S4C). Therefore,  
150 we chose supplementation of lysozyme as the functional recovery of Paneth cells to restore the intestinal  
151 homeostasis.

152 We observed less severe pancreatic injuries and apoptosis as well as much lower amylase level and  
153 pancreatic W/D weight ratio in Lyz+Dith+AP mice than those in Dith+AP mice ( $p < 0.05$ ) (Figure 7A-D).  
154 The pancreatic inflammation was attenuated in Lyz+Dith+AP mice ( $p < 0.05$ ), as evidenced by the decline  
155 in proinflammatory cytokines (Figure 7E). Compared with Dith+AP mice, Lyz+Dith+AP mice also  
156 showed mild intestinal epithelial injuries and apoptosis along with decreased ileal and systematic  
157 inflammation ( $p < 0.05$ ) (Figure 7F-H).

158 **Lysozyme restored intestinal barrier integrity and protected against bacterial translocation.**  
159 The expression of the TJPs (claudin1, occludin, ZO-1) was increased following lysozyme administration  
160 in Dith+AP mice (Figure S4D-G). The mRNA expression of Wnt3a, TGF $\beta_2$  and Lgr5 and protein  
161 expression of Lgr5 were restored in Lyz+Dith+AP mice (Figure 8A-B). Moreover, lysozyme  
162 supplementation restored the proliferation of IECs, which was suppressed in Dith+AP mice, as determined  
163 by PCNA staining (Figure 8C).

164 Lyz+Dith+AP mice presented lower intestinal permeability than Dith+AP mice, based on  
165 measurements of serum levels of D-lactate, DAO and endotoxin ( $p < 0.05$ ) (Figure 8D-F). The FISH  
166 analysis confirmed a decreased number of bacteria within the intestinal mucosa and the pancreas of  
167 Lyz+Dith+AP mice versus Dith+AP mice (Figure 8G-H). The number of anaerobes translocated to the  
168 liver and mesenteric lymph nodes also reduced significantly in Lyz+Dith+AP mice ( $p < 0.05$ ) (Figure 8I-

169 J). These results suggested that pretreatment with lysozyme attenuated AP by reducing bacterial  
170 translocation and promoted mucosal repair by stimulating the proliferation of IECs.

171 **Lysozyme regulated microbiota disorders induced by dysfunction of Paneth cells.** We then  
172 evaluated the contribution of lysozyme-modulated microbiota in Dith+AP mice by fecal microbiota  
173 transplantation (FMT). ~~Fecal~~ The fecal microbiota of Lyz+Dith mice and Dith mice was colonized to ABX  
174 mice followed by induction of AP. ABX mice receiving feces from Lyz+Dith mice developed less severe  
175 pancreatic and ileal injuries ( $p < 0.05$ ) compared with those receiving feces from Dith mice (Figure 9A-  
176 C). Alleviated pancreatic and ileal inflammation ~~were~~ was evidenced by reduced proinflammatory  
177 cytokines ( $p < 0.05$ ) by real time PCR in ABX mice receiving FMT from Lyz+Dith mice compared with  
178 those receiving FMT from Dith mice (Figure 9D-E). Therefore, lysozyme markedly reduced the severity  
179 of AP exacerbated in Dith+AP mice via regulating gut microbiota.

180 PCoA analysis showed that lysozyme gavage greatly shifted microbiota structure in Dith+AP mice  
181 (Figure 9F). Compared with Dith+AP mice, increased Chao1 index and ~~shannon~~ Shannon index ( $p < 0.05$ )  
182 and decreased ~~simpson~~ Simpson index ( $p < 0.05$ ) showed increased alpha diversity of bacterial  
183 communities in lysozyme (Lyz) +Dith+AP mice (Figure 9G-I). At the phylum level, compared with  
184 Dith+AP mice, Lyz+Dith+AP mice presented increased relative abundance of *Firmicutes* ( $p < 0.05$ ) and  
185 decreased relative abundance of *Bacteroidetes* and *Proteobacteria* ( $p < 0.05$ ) and the normalized ratio of  
186 F/B ( $p < 0.05$ ) (Figure 9J, S3B). At the genus level, supplementation of lysozyme restored the relative  
187 abundance of *Helicobacter* and *Blautia* in Dith+AP mice ( $p < 0.05$ ) (Figure 9K). Therefore, lysozyme  
188 could restructure microbiota composition disrupted in Dith+AP mice.

189 We then carried out real time PCR for the four prevalent species of *Helicobacter*. spp and the three

190 prevalent species of *Blautia* spp (20, 21). (Figure S3C). Compared with Con group, level of *Helicobacter*  
191 *felis* (*H. felis*), *Helicobacter hepaticus* (*H. hepaticus*) and *Blautia coccoides* (*B. coccoides*) increased  
192 significantly and level of *Blautia obeum* (*B. obeum*) decreased greatly in Dith group, level of *Helicobacter*  
193 *bilis* (*H. bilis*), *H. hepaticus* and *Bautia wexlerae* (*B. wexlerae*) increased significantly and level of *B.*  
194 *obeum* decreased greatly in AP group. Compared with AP group, the level of *H. bilis*, *H. felis*, *B. coccoides*,  
195 *B. obeum* and *B. wexlerae* decreased greatly and *H. hepaticus* increased significantly in Dith+AP group.  
196 Compared with Dith+AP group, level of *H. felis*, *B. obeum* and *B. wexlerae* increased greatly and the level  
197 of *H. hepaticus* and *B. coccoides* significantly decreased in Lyz+Dith+AP group. Although the association  
198 of *Helicobacter pylori* (*H. pylori*) with prolonged hospital stay in AP patients has been reported (22), *H.*  
199 *pylori* cannot be detected by real time PCR in the contents of the cecum (data not shown) in our research.  
200 The possible significance of specific species is discussed in the Discussion.

201 **Lysozyme promoted enteroid proliferation through regulating functions of Paneth cell.** We  
202 cultured enteroids to investigate IECs-lysozyme interactions based on the well-established technology of  
203 3D culture. Compared with Con group, we observed that after 72 h intervention of lysozyme, both surface  
204 area and number of crypt buds per enteroid increased significantly ( $p < 0.05$ ) (Figure 10A-C) (23).  
205 Lysozyme administration also promoted the proliferation of enteroids, as reflected by an increase in  
206 expression of PCNA, TJPs (occluding and claudin1), and Lgr5 ( $p < 0.05$ ) (Figure 10D-F, S6B). Compared  
207 with Con group, Wnt3a and TGF $\beta$ , along with  $\beta$ -catenin and c-myc, two crucial molecules of Wnt  
208 signaling pathway (24, 25), were significantly up-regulated ( $p < 0.05$ ) in Lyz group (Figure 10F-H, S6B)).  
209 In addition, mRNA expression of AMPs (lysozyme, Defa5, Reg3 $\gamma$ , Ang4) ~~were~~ was also increased greatly  
210 ( $p < 0.05$ ) in the Lyz group (Figure 10I, S4A-D).

211 LPS was utilized to imitate the inflammatory microenvironment in enteroid system (26). In Lyz+LPS  
212 group, the release of proinflammatory factors was decreased ( $p < 0.05$ ) (Figure 10J), while cell  
213 proliferation and the integrity of the intercellular TJPs which were disrupted in the LPS group were  
214 protected by lysozyme (Figure 10D-H, S6B). To note, lysozyme failed to reverse the reduction of AMPs  
215 of Paneth cells induced by LPS (Figure 10I, S5A-D).

## 216 Discussion

217 In this study, we first confirmed the dysfunction of Paneth cell in AP patients. Our in vivo experiments  
218 showed that long-term reduction of Paneth cells exacerbated injuries and inflammation in the pancreas  
219 and small intestine in AP mice. Dith+AP mice also presented with increased intestinal permeability,  
220 bacteria translocation, and intestinal microbiota disorder compared with AP mice. Such changes were  
221 significantly reversed by lysozyme treatment. Functional recovery of Paneth cells s might be a novel target  
222 for the treatment of intestinal dysfunction during AP.

223 Paneth cells constitute part of innate immunity by secreting various antimicrobial peptides. High A  
224 high concentration of antimicrobial peptides in crypts constructs a relatively sterile environment and  
225 prevents pathogen invasion (27). The involvement of Paneth cell dysfunction in the pathogenesis of  
226 multiple ~~deseases~~ diseases has been widely reported, such as Crohn's disease (CD) (11), alcoholic  
227 steatohepatitis (28), graft-versus-host disease (GVHD) (29), irritable bowel syndrome (IBS) (15), etc. The  
228 dysfunction of Paneth cell in AP patients and AP mice, manifested by a marked reduction of number of  
229 Paneth cells and expression of AMPs, was in line with previous findings in rats (30). Our previous study  
230 demonstrated that acute ablation of Paneth cells using dithizone aggravated the severity of rat AP, but the  
231 mechanism of a protective role of Paneth cells s in AP remains unclear (14). Therefore, we established a



232 model with a long-term reduction of Paneth cells. Inflammation and damage were significantly increased  
233 in the pancreas and small intestine of Dith+AP mice compared with that of AP mice.

234 AP is often accompanied by intestinal barrier dysfunction, and the translocation of bacteria derived  
235 from the small intestine exacerbates systemic inflammation (31). Intestinal dysfunction in AP is thought  
236 to be associated with ischemia-reperfusion damage, severe oxidative stress, and apoptosis in the intestinal  
237 mucosa (32, 33). In recent years, Paneth cells have been proved to regulate the proliferation of intestinal  
238 stem cells and maintain the dynamic balance of intestinal epithelial cells by secreting support factors (10).  
239 *Bifidobacterium longum* promotes cell proliferation and expression of Lgr5 and wnt3a in intestinal  
240 organoids by regulating functions of the Paneth cell (34). VDR<sup>APC</sup> mice exhibited abnormal Paneth cells  
241 and decreased expression of PCNA and  $\beta$ -catenin (35). Our study found that compared with AP mice,  
242 Dith+AP mice exhibited markedly decreased TJPs expression, increased intestinal permeability and  
243 bacteria translocation, Meanwhile, expression of Lgr5, Wnt3a, TGF $\beta$  and intestinal epithelial proliferation  
244 were also significantly reduced. These findings suggested that Paneth cell dysfunction resulting in its  
245 diminished support for intestinal stem cells was part of the reasons for increased intestinal permeability  
246 during AP.

247 Intestinal microbiota disorders are common in patients with moderate or severe AP and are  
248 significantly related to the severity of inflammation, indicating that intestinal microbiota is involved in the  
249 progression of AP (5). Administration of *Escherichia coli* MG1655 in AP rats aggravated injuries in the  
250 pancreas and small intestine and activated TLR4/MyD88/MAPK and endoplasmic reticulum stress in  
251 intestinal epithelial cells, while *Parabacteroides* produces acetate to alleviate heparanase-exacerbated AP  
252 through reducing neutrophil infiltration(36, 37). The inflammation was significantly reduced in ABX mice

253 with AP further proved the role of gut microbiota in AP (36, 38). Paneth cells protect the host from  
254 intestinal pathogens and shape the composition of the colonized microbiota. FMT proved that gut  
255 microbiota disturbance caused by long-term reduction of Paneth cells played an important role in AP  
256 aggravation. 16S rRNA sequencing of cecal content revealed that long-term reduction of Paneth cells  
257 altered gut microbiota structure, decreased richness and diversity, increased the relative abundance of  
258 deleterious bacteria *Helicobacter* and decreased the relative abundance of beneficial bacteria *Blautia*.

259 Supplementing products of Paneth cell as functional recovery is a commonly used method in studies  
260 related to Paneth cell dysfunction. HD5 supplementation effectively altered gut microbiota in alcoholic  
261 hepatitis and reversed alcohol-induced damage (28). Lysozyme supplementation prevented *Escherichia*  
262 *coli* expansion and visceral hypersensitivity during maternal isolation (15). ANG1 treatment prevented  
263 dysbiosis in mice and alleviated DSS-induced colitis (39). Overexpression of Reg3 $\gamma$  protected mice from  
264 alcoholic hepatitis and reduced bacterial translocation (40). Supplement of lysozyme was the most  
265 appropriate as a functional recovery of Paneth cells in our study. Pretreatment of lysozyme restored gut  
266 microbiota disturbance, reduced relative abundance of *Helicobacter*, restored relative abundance of  
267 *Blautia*, and reversed aggravated ileal and pancreatic injuries in Dith+AP mice. FMT further confirmed  
268 that Paneth cells played a protective role in AP by stabilizing the intestinal microbiota.

269 Lysozyme is a cornerstone of innate immunity. Previous in vitro studies showed that lysozyme is a  
270 non-specific antimicrobial peptide, while different bacteria possessed distinct sensitivity to lysozyme (41-  
271 44). Although in our research *H. pylori* cannot be detected by real time PCR, studies have shown that *H.*  
272 *pylori* positive patients exhibited a higher relative abundance of *Proteobacteria* (45). The changes of *H.*  
273 *hepaticus* and *B. obeum* are of concern and warrants further research (Figure S3C). Studies

274 demonstrated that cytolethal distending toxin subunit B (CdtB) produced by *H. hepaticus* exacerbated the  
275 severity of colitis via inducing inflammatory response and activating the Jak-Stat signaling pathway (46,  
276 47). *B. obeum* generating bile salt hydrolases (BSH) could inhibit~~ing~~ the growth and colonization of *Vibrio*  
277 *cholerae* and *Clostridioides difficile* (48, 49). These researches suggested that changes of *H. hepaticus* and  
278 *B. obeum* might be involved in progre~~s~~sion of AP. The role of species altered by Paneth cells depletion or  
279 lysozyme supplement in AP required further investigation.

280 In addition to the antimicrobial effect, lysozyme modulated innate immunity. The sensing of  
281 lysozyme-mediated production of pathogen-associated molecular patterns (PAMP) by pattern recognition  
282 receptor (PRR) stimulated downstream proinflammatory signaling and the production of proinflammatory  
283 cytokines (50, 51). Lysozyme could also limit intestinal inflammation. Zhang et al showed that intestinal  
284 inflammation was associated with the failure of secretion of Paneth cell lysozyme in mouse model of  
285 Crohn's disease (52, 53). Furthermore, lysozyme supplement~~s~~ could ameliorate intestinal inflammation of  
286 porcine colitis (54). Mechanisms of lysozyme limiting intestinal inflammation ~~was-were~~ still unclear with  
287 speculation of limited bacterial invasion and activated protective intestinal immune response.

288 Organoid techniques have become a powerful tool for studying intestinal epithelium in vitro (55, 56).  
289 Lysozyme intervention promoted the growth of organoids, activated the Wnt pathway~~s~~, and promoted  
290 epithelial proliferation. Therefore, lysozyme secreted by Paneth cells not only maintain~~s~~ microbiota  
291 homeostasis~~r~~, but also promote~~s~~ proliferation of the intestinal organoids. Studies designed to explore  
292 possible mechanism~~s~~ should be fu~~r~~ther performed.

293 We first used the method of multiple intraperitoneal injections of dithizone to maintain Paneth cells  
294 at a low level, but this method still had limitations. The protective effect of functional recovery of Paneth

295 cells in AP mice provides new strategies for clinical treatment of intestinal complications during AP.

## 296 **Materials and Methods**

297 ***Human intestinal biopsies.*** After obtaining written informed consent, human intestinal biopsies from  
298 the descending part of the duodenum of 21 patients with AP and 14 healthy controls were obtained upon  
299 endoscopy from the department of gastroenterology of Shanghai General Hospital, excluding individuals  
300 with diseases affecting Paneth cells, including irritable bowel syndrome, inflammatory bowel disease,  
301 alcoholic liver disease, etc. There was no statistical difference in baseline demographic and clinical  
302 characteristics between AP patients and healthy controls (See Table S1). Biopsies were stored in 4%  
303 Paraformaldehyde or liquid nitrogen.

304 ***Animals.*** Male C57BL/6 mice (6-8 weeks, 20-25 g) were obtained from Shanghai SLAC Laboratory  
305 Animal Co. Mice were housed under specific pathogen-free (SPF) conditions with a room temperature of  
306 24±2°C and a 12 h light/dark cycle.

307 ***Experimental design.*** Mice were randomly divided into 5 groups (n = 6) : control (Con) group,  
308 dithizone (Dith) group, AP group, Dith+AP group and lysozyme (Lyz) treated (Lyz+Dith+AP) group. Mice  
309 in Dith group, Dith+AP group and Lyz+Dith+AP group were intraperitoneally injected with 40 mg/kg  
310 dithizone (Sigma-Aldrich, USA) every three days for two weeks. The mice in Lyz+Dith+AP group  
311 received oral gavage of 200 U/day lysozyme (Sigma-Aldrich, USA) for two weeks. Mice in the Con group  
312 and AP group were intraperitoneally injected with normal saline (NS). After treatment of dithizone or NS,  
313 mice in AP group, Dith+AP group and Lyz+Dith+AP group were injected intraperitoneally twice with 4.5  
314 g/kg L-arginine (Sigma-Aldrich, USA). Mice in Con group and Dith group were intraperitoneally injected  
315 with normal saline (NS). Mice in Cae+AP group were injected intraperitoneally with 100 µg/kg caerulein

316 (MedChemExpress, CN) ten times with an hour interval between consecutive injections. After the final  
317 injection, 5 mg/kg Lipopolysaccharide (Sigma-Aldrich, USA) was intraperitoneally injected. Mice in  
318 N+AP group were induced AP as previously described (57). 2 % sodium taurocholate (Sigma-Aldrich,  
319 USA) solution at a volume of 50  $\mu$ l /20 g bodyweight was infused into the biliopancreatic duct at the speed  
320 of 5  $\mu$ l/min. Mice were anesthetized with Zoletil50 were used to anesthetize and then sacrificed at 72 h  
321 after the first injection of L-arginine. Blood samples, distal ileum, pancreas, liver, and mesenteric lymph  
322 nodes were collected, and stored at -80 °C or 4% paraformaldehyde. Fresh contents in ileocecum were  
323 also collected for analysis of gut microbiota.

324 ***Histological analysis.*** Fresh pancreas and distal ileum were soaked in 4% paraformaldehyde and  
325 dehydrated. Tissues were then embedded in paraffin and cut into sections of 4  $\mu$ m. Sections were stained  
326 with hematoxylin and eosin (H&E, Servicebio, China) as previously described (58). Histopathological  
327 injury-injuries were examined by a light microscope (Leica, Germany). ~~Pancreatic~~The pancreatic injury  
328 was assessed according to scoring criteria reported by Schmidt et al (59), while distal ileal injury was  
329 evaluated as described by Chiu et al (60). Paneth cells were counted as previously reported (61).

330 ***Real time PCR.*** Tissue total RNA was extracted using TRIzol (Invitrogen, USA) and Tissus RNA  
331 Purification Kit Plus (EZBioscience, USA). Complementary DNA (cDNA) synthesis was performed using  
332 HyperScript III RT SuperMix (EnzyArtisan, China) for qPCR with gDNA Remover. Bacterial DNA was  
333 extracted from fecal samples with E.Z.N.A. Stool DNA Kit (Omega, USA) .The concentration of RNA  
334 or DNA was detected by NanoDrop2000 (Thermo Scientific, USA). 2x S6 Universal SYBR qPCR Mix  
335 (EnzyArtisan, China) was used to perform real time PCR with QuantStudio 6 Flex Realtime PCR Systems  
336 (Thermo Scientific, USA) following this protocol: predenaturation (95 °C, 30 s), 40 amplification cycles

337 of denaturation (95 °C, 10 s) and annealing and extension (60 °C, 30 s). Gene expression was measured  
338 by 2<sup>-ΔΔCt</sup> method. Primers used for detection were provided in Table S2.

339 ***Pancreas wet weight to dry weight (W/D) ratio and serum amylase assays.*** The pancreatic tissue  
340 was weighed and then incubated at 80 °C for 48 h to obtain a constant weight as the dry weight. The ratio  
341 of the wet pancreas weight to the dry pancreas weight was calculated to evaluate tissue edema. The level  
342 of serum amylase was detected by Amylase Reagents using ADVIA 2400 Chemistry System (SIEMENS,  
343 German) according to technicians' instructions.

344 ***Immunofluorescence.*** Distal ileal sections were heated at 60 °C for 1 h. Then, sections were soaked  
345 into different jars (xylene 40 min, 100% ethanol 10 min, 95% ethanol 10 min, 80% ethanol 5 min, 70%  
346 ethanol 5 min, doubly-distilled water 3 min) to deparaffinize and rehydrate. Antigens were retrieved with  
347 citrate antigen retrieval solution (Sangon Biotech, CN). After repeatedly washing in phosphate-buffered  
348 saline (PBS), super pap pen (Sangon Biotech, CN) was used to draw a circle around tissue. Slides were  
349 blocked with immunostaining blocking buffer (Sangon Biotech, CN) at room temperature for 1 h, and  
350 incubated with primary antibody against PCNA (A0264, Abclonal, CN), occludin (A2601, Abclonal, CN),  
351 claudin-1 (ab211737, Abcam, USA), ZO-1 (13663, Cell Signaling Technology, USA) diluted by primary  
352 antibody dilution buffer (Sangon Biotech, CN) at 4 °C overnight. Slides were washed with PBS and  
353 incubated with Alexa Fluor 488 AffiniPure Donkey anti-Rabbit IgG (Yeaston, CN) for 1 h at room  
354 temperature. Then, the slides were washed with PBS and stained with dihydrochloride (Yeaston, CN) for  
355 10 min. Images were captured with a fluorescence microscope (Leica, USA).

356 ***Western blot.*** Distal ileum tissues were lysed in RIPA lysis buffer (Epizyme Biotech, CN) with 1%  
357 protease inhibitor (Epizyme Biotech, CN) and fully ground using a high-throughput tissue grinder (Onebio.

358 Biotech, CN). The suspension was left to settle on ice for 1 h and centrifuged at 10000 g for 10 min at  
359 4 °C. After taking the supernatant and mixing with the SDS-loading buffer (Yeason, CN), the mixed  
360 solution was heated at 100°C for 10 min. 10 µl solution was loaded into a 10% SDS-PAGE gel produced  
361 by PAGE Gel Fast Preparation Kit (Epizyme Biotech, CN) for electrophoresis. Then proteins in the gel  
362 were transferred to 0.2 µm PVDF membrane (Millipore, USA). The membrane was blocked with 3%  
363 bovine serum albumin (BSA) for 1 h and incubated with primary antibodies diluted by primary antibody  
364 dilution buffer (Epizyme Biotech, CN) against Lgr5 (A10545, Abclonal, CN), lysozyme (A0099, Dako,  
365 Danmark), Reg3γ (sc-377038, Santa Cruz Biotechnology, USA), Defa5 (A18208, Abclonal, CN), Ang4  
366 (sc-377497, Santa Cruz Biotechnology, USA), sPLA2 (sc-58363, Santa Cruz Biotechnology, USA)  
367 overnight at 4 °C. ~~The~~On the second day, the membrane was washed 3 times with Tris-buffered saline  
368 with Tween-20 (TBST) buffer and incubated with Peroxidase-Conjugated Goat Anti-Rabbit IgG (H+L)  
369 (Yeason, CN) for 60 min at room temperature. ~~Membrane~~The membrane was washed 3 times with TBST  
370 again. Bands were visualized with HRP Substrate Peroxide Solution (Millipore, USA) by Amersham  
371 Imager 600 (General Electric, USA).

372 ***Enzyme-linked immunosorbent assay (ELISA).*** The levels of IL-1β, TNF-α, and IL-6 in the serum,  
373 pancreas and ileum were detected by Luminex Mouse Discovery Assay Kit (R&D Systems,  
374 USA) according to the instructions. The levels of pancreatic MPO, serum endotoxin, DAO and D-Lactate  
375 were measured using MPO mice ELISA kit, endotoxin mice ELISA kit, DAO mice ELISA kit and D-  
376 Lactate mice ELISA kit (MultiSciences Biotech, CN) according to provided protocols.

377 ***TUNEL and FISH assay.*** Apoptosis was evaluated by Tunel assay using Fluorescein Tunel Cell  
378 Apoptosis Detection Kit (Servicebio, CN) according to the instructions. Pancreatic and ileal Tunel positive

379 cell counting ~~were~~was performed at ×200 magnification. Fluorescence in situ hybridization (FISH) was  
380 used to detect bacterial translocation as previously described. In short, sections of the distal ileum and  
381 pancreas were heated 60 min and dewaxed (2×10 min with 100% xylene, 5 min with 100% ethanol). Next,  
382 sections were incubated with specific probes (EUB338: 5'-Cy3-GCTGCCTCCCGTAGGAGT-3') in a wet  
383 box at 52 °C for 18 h. Then, sections were washed and stained with DAPI. Images were captured with a  
384 fluorescence microscope (Leica, USA).

385 ***Bacterial cultures and plate counting.*** Mesenteric lymph nodes and liver tissues were collected in  
386 sterile PBS, fully ground using a high-throughput tissue grinder (Onebio, Biotech, CN), and plated onto  
387 brain heart infusion agar plates for a culture of anaerobic bacteria. The plates were incubated for 48 h at  
388 37 °C using Oxoid AnaeroGen 2.5 L and Oxoid Resazurin Anaerobic Indicator (Thermo Scientific, USA).  
389 The plates producing 25 to 250 colony-forming units (CFUs) were counted.

390 ***Fecal microbiota transplantation (FMT).*** Feces ~~were~~was collected from Con mice, Dith mice, and  
391 Dith+Lyz mice. The processing of FMT suspension was done within 2 hours. 100 mg feces was  
392 resuspended in 1 mL saline and centrifuged for 5 min. The supernatant was used as FMT suspension. The  
393 mice receiving antibiotics were treated with vancomycin (0.5 mg/mL), neomycin (1 mg/mL), ampicillin  
394 (1 mg/mL), and metronidazole (1 mg/mL) (Sangon Biotech, CN) in their drinking water for 4 weeks. Mice  
395 were divided into four groups: Con group, ABX+Con group, ABX+Dith group and ABX+Dith+Lyz group.  
396 Con group received no treatment. ABX+Con group ~~were~~was gavaged with feces from control mouse for  
397 1 weeks, ABX+Dith group ~~were~~was gavaged with 200µL FMT suspension from Dith mice for 1 weeks,  
398 and ABX+Dith+Lyz group was gavaged with 200µL FMT suspension from Dith+Lyz mice for 1 weeks.  
399 AP was induced in mice from ABX+Con group, ABX+Dith group and ABX+Dith+Lyz group.



400 **16S rRNA sequencing.** Genomic DNA was extracted from the contents of the ileocecum using  
401 E.Z.N.A. Stool DNA Kit (Omega, USA) according to the manufacturer's instructions and amplified using  
402 forward (5'- TACGGRAGGCAGCAG -3') and reverse (5'- AGGGTATCTAATCCT -3'). 16S rDNA high-  
403 throughput sequencing was performed on an Illumina HiSeq platform (Illumina, USA) according to the  
404 standard protocols by the Majorbio Bio-Pharm Technology. The raw sequencing reads of this study are  
405 openly available in BioProject at <https://www.ncbi.nlm.nih.gov/bioproject/PRJNA774193>, reference  
406 number PRJNA774193.

407 **Microbiome analysis.** The sequences were filtered with fastp (0.19.6) and merged with FLASH  
408 (v1.2.11). Then the high-quality sequences were denoised using DADA2 plugin in the QIIME2 (version  
409 2020.2) pipeline with recommended parameters, which are called amplicon sequence variants (ASVs).  
410 Taxonomic assignment of ASVs was performed using the Naive bayes consensus taxonomy classifier  
411 implemented in QIIME2 and the SILVA 16S rRNA database (v138). Analysis of the gut microbiota was  
412 carried out using the Majorbio Cloud platform (<https://cloud.majorbio.com>). Alpha diversity indices  
413 including Chao1 richness, Shannon index and Simpson index were calculated with Mothur v1.30.1.  
414 Principal coordinate analysis (PCoA) based on Bray-curtis dissimilarity using Vegan v2.5-3 package was  
415 performed to analyse the microbial communities in different samples. The linear discriminant analysis  
416 (LDA) effect size (LEfSe) was performed to identify the significantly abundant genera of bacteria among  
417 the different groups (LDA score > 2, P < 0.05). Correlations between histopathological score, serum D-  
418 lactate and DAO, serum inflammation factors, endotoxin and the relative abundance of different genera  
419 were calculated using Spearman's analysis.

420 **Enteroids establishment and co-culture with lysozyme.** Enteroids were obtained from C57BL/6 mice.

421 The distal 10 cm of the small intestine was collected and flushed gently with ice-cold PBS for 5 min. Then  
422 the intestine ~~were~~was cut open along their longitudinal axis and cut to 2 mm segments. Crypts were  
423 isolated from the segments by incubating in 2 mM EDTA for 30 min, and then in 5 mM EDTA for 30 min.  
424 After 5 min resting, the supernatant was removed. Crypts were resuspended in 15 ml DMEM F12 (Wisent,  
425 China) with repeatedly blowing. Then the suspension was filtered through a 70 µm filter mesh (BD  
426 Biosciences, USA) and centrifuged at 300 g for 5 min. After the supernatant was discarded, the pellet was  
427 mixed with Matrigel (Corning, USA) and DMEM F12 in 1:1 ratio. Then 50 µL suspension was planted  
428 into each well of the pre-warmed 24 well plates and 700 µL of IntestiCult™ Organoid Growth Medium  
429 (Mouse) (Stemcell Technologies, Canada) was added per well. In the following culture, the half medium  
430 was replaced every 3 day, and passaged every 9 days. 200 U lysozyme was added into enteroids per well  
431 and incubated at 37 °C and 5% CO<sub>2</sub> for 72 h. 1 mg/mL LPS with 200 U lysozyme was added into enteroids  
432 per well and incubated for 24 h. Total RNA was extracted using EZ-press RNA Purification Kit  
433 (EZBioscience, USA). The methods of real time PCR, western blot and immunofluorescence of enteroids  
434 are the same as above.

435 ***Statistical analysis.*** Data was exhibited in the form of mean ± standard deviation (SD). Comparisons  
436 between two groups with a normal distribution were performed by t-test. Spearman's rank correlation  
437 coefficient was used to detect correlations between bacterial genus and indicators. One-way ANOVA was  
438 performed for three or more groups. Differences in the male/female ratio and BMI rates between groups  
439 were tested by the Chi-square test. All the statistical analyses were carried out in IBM SPSS Statistics 25.  
440 P<0.05 suggested a statistically significant difference.

441 ***Study approval.*** All studies involving human samples were approved by the Ethics Committee of

442 Shanghai General Hospital (2021035) and registered in Chinese Clinical Trial Registry  
443 (ChiCTR1800017214). All the animal experiments were approved by Institutional Animal Care and Use  
444 Committee (IACUC) (2020AW095) and conducted according to the instructions of IACUC.

#### 445 **Author contributions**

446 YF and YZ designed the studies; YF, QM and NY performed experiments and acquired data; BL and  
447 SL obtained human intestinal biopsies. ZH and BX analyzed and interpreted the data; YF drafted the  
448 manuscript; JF, CH and YZ revised the manuscript critically with important intellectual contents. All  
449 authors approved the final version of the manuscript

#### 450 **Acknowledgements**

451 The authors have declared that no conflict of interest exists. This work was financially supported by  
452 the Clinical Research Plan of SHDC (SHDC2020CR2014A) and the National Natural Science Foundation  
453 of China (81970555).

454

#### 455 **References**

- 456 1. Peery AF, Crockett SD, Murphy CC, Lund JL, Dellon ES, Williams JL, Jensen ET, Shaheen NJ, Barritt AS, Lieber SR, Kochar  
457 B, Barnes EL, Fan YC, Pate V, Galanko J, Baron TH, Sandler RS. 2019. Burden and Cost of Gastrointestinal, Liver, and  
458 Pancreatic Diseases in the United States: Update 2018. *Gastroenterology* 156:254-272.e11.
- 459 2. Boxhoorn L, Voermans RP, Bouwense SA, Bruno MJ, Verdonk RC, Boermeester MA, van Santvoort HC, Besselink MG.  
460 2020. Acute pancreatitis. *Lancet* 396:726-734.
- 461 3. Fritz S, Hackert T, Hartwig W, Rossmannith F, Strobel O, Schneider L, Will-Schweiger K, Kommerell M, Büchler MW,  
462 Werner J. 2010. Bacterial translocation and infected pancreatic necrosis in acute necrotizing pancreatitis derives from  
463 small bowel rather than from colon. *Am J Surg* 200:111-7.
- 464 4. Van Felius ID, Akkermans LM, Bosscha K, Verheem A, Harmsen W, Visser MR, Gooszen HG. 2003. Interdigestive small  
465 bowel motility and duodenal bacterial overgrowth in experimental acute pancreatitis. *Neurogastroenterol Motil*  
466 15:267-76.
- 467 5. Tan C, Ling Z, Huang Y, Cao Y, Liu Q, Cai T, Yuan H, Liu C, Li Y, Xu K. 2015. Dysbiosis of Intestinal Microbiota Associated  
468 With Inflammation Involved in the Progression of Acute Pancreatitis. *Pancreas* 44:868-75.

- 469 6. Liu Z, Shen Y, Cui N, Yang J. 2011. Clinical observation of immunity for severe acute pancreatitis. *Inflammation* 34:426-  
470 31.
- 471 7. Porter EM, Bevins CL, Ghosh D, Ganz T. 2002. The multifaceted Paneth cell. *Cell Mol Life Sci* 59:156-70.
- 472 8. Salzman NH, Hung K, Haribhai D, Chu H, Karlsson-Sjöberg J, Amir E, Tegatz P, Barman M, Hayward M, Eastwood D,  
473 Stoel M, Zhou Y, Sodergren E, Weinstock GM, Bevins CL, Williams CB, Bos NA. 2010. Enteric defensins are essential  
474 regulators of intestinal microbial ecology. *Nat Immunol* 11:76-83.
- 475 9. Bevins CL, Salzman NH. 2011. Paneth cells, antimicrobial peptides and maintenance of intestinal homeostasis. *Nat*  
476 *Rev Microbiol* 9:356-68.
- 477 10. Sato T, van Es JH, Snippert HJ, Stange DE, Vries RG, van den Born M, Barker N, Shroyer NF, van de Wetering M, Clevers  
478 H. 2011. Paneth cells constitute the niche for Lgr5 stem cells in intestinal crypts. *Nature* 469:415-8.
- 479 11. Cadwell K, Liu JY, Brown SL, Miyoshi H, Loh J, Lennerz JK, Kishi C, Kc W, Carrero JA, Hunt S, Stone CD, Brunt EM, Xavier  
480 RJ, Sleckman BP, Li E, Mizushima N, Stappenbeck TS, Virgin HW. 2008. A key role for autophagy and the autophagy  
481 gene Atg16l1 in mouse and human intestinal Paneth cells. *Nature* 456:259-63.
- 482 12. Coutinho HB, da Mota HC, Coutinho VB, Robalinho TI, Furtado AF, Walker E, King G, Mahida YR, Sewell HF, Wakelin D.  
483 1998. Absence of lysozyme (muramidase) in the intestinal Paneth cells of newborn infants with necrotising  
484 enterocolitis. *J Clin Pathol* 51:512-4.
- 485 13. Estienne M, Claustre J, Clain-Gardechaux G, Paquet A, Taché Y, Fioramonti J, Plaisancié P. 2010. Maternal deprivation  
486 alters epithelial secretory cell lineages in rat duodenum: role of CRF-related peptides. *Gut* 59:744-51.
- 487 14. Guo Y, Huang C, Liu L, Fu X, Lu Y, Zheng J, Mei Q, Huang Z, Fan J, Lu L, Zeng Y. 2019. Paneth Cell Ablation Aggravates  
488 Pancreatic and Intestinal Injuries in a Rat Model of Acute Necrotizing Pancreatitis after Normal and High-Fat Diet.  
489 *Mediators Inflamm* 2019:8474523.
- 490 15. Riba A, Olier M, Lacroix-Lamandé S, Lencina C, Bacquié V, Harkat C, Gillet M, Baron M, Sommer C, Mallet V, Salvador-  
491 Cartier C, Laurent F, Théodorou V, Ménard S. 2017. Paneth Cell Defects Induce Microbiota Dysbiosis in Mice and  
492 Promote Visceral Hypersensitivity. *Gastroenterology* 153:1594-1606.e2.
- 493 16. Schoenborn AA, von Furstenberg RJ, Valsaraj S, Hussain FS, Stein M, Shanahan MT, Henning SJ, Gulati AS. 2019. The  
494 enteric microbiota regulates jejunal Paneth cell number and function without impacting intestinal stem cells. *Gut*  
495 *Microbes* 10:45-58.
- 496 17. Lucas López R, Grande Burgos MJ, Gálvez A, Pérez Pulido R. 2017. The human gastrointestinal tract and oral  
497 microbiota in inflammatory bowel disease: a state of the science review. *Apmis* 125:3-10.
- 498 18. Shin NR, Whon TW, Bae JW. 2015. Proteobacteria: microbial signature of dysbiosis in gut microbiota. *Trends*  
499 *Biotechnol* 33:496-503.
- 500 19. Hayase E, Hashimoto D, Nakamura K, Noizat C, Ogasawara R, Takahashi S, Ohigashi H, Yokoi Y, Sugimoto R, Matsuoka  
501 S, Ara T, Yokoyama E, Yamakawa T, Ebata K, Kondo T, Hiramane R, Aizawa T, Ogura Y, Hayashi T, Mori H, Kurokawa K,  
502 Tomizuka K, Ayabe T, Teshima T. 2017. R-Spondin1 expands Paneth cells and prevents dysbiosis induced by graft-  
503 versus-host disease. *J Exp Med* 214:3507-3518.
- 504 20. Smet A, Menard A. 2020. Review: Other Helicobacter species. *Helicobacter* 25 Suppl 1:e12744.
- 505 21. Liu X, Mao B, Gu J, Wu J, Cui S, Wang G, Zhao J, Zhang H, Chen W. 2021. Blautia-a new functional genus with potential  
506 probiotic properties? *Gut Microbes* 13:1-21.
- 507 22. Khan J, Pelli H, Lappalainen-Lehto R, Järvinen S, Sand J, Nordback I. 2009. Helicobacter pylori in alcohol induced acute  
508 pancreatitis. *Scand J Surg* 98:221-4.
- 509 23. Fuller MK, Faulk DM, Sundaram N, Shroyer NF, Henning SJ, Helmrath MA. 2012. Intestinal crypts reproducibly expand

- 510 in culture. *J Surg Res* 178:48-54.
- 511 24. Katoh M, Katoh M. 2007. WNT signaling pathway and stem cell signaling network. *Clin Cancer Res* 13:4042-5.
- 512 25. Dang CV. 2012. MYC on the path to cancer. *Cell* 149:22-35.
- 513 26. Günther C, Buchen B, He GW, Hornef M, Torow N, Neumann H, Wittkopf N, Martini E, Basic M, Bleich A, Watson AJ,  
514 Neurath MF, Becker C. 2015. Caspase-8 controls the gut response to microbial challenges by  $Tnf-\alpha$ -dependent and  
515 independent pathways. *Gut* 64:601-10.
- 516 27. Salzman NH, Bevins CL. 2013. Dysbiosis--a consequence of Paneth cell dysfunction. *Semin Immunol* 25:334-41.
- 517 28. Zhong W, Wei X, Hao L, Lin TD, Yue R, Sun X, Guo W, Dong H, Li T, Ahmadi AR, Sun Z, Zhang Q, Zhao J, Zhou Z. 2020.  
518 Paneth Cell Dysfunction Mediates Alcohol-related Steatohepatitis Through Promoting Bacterial Translocation in Mice:  
519 Role of Zinc Deficiency. *Hepatology* 71:1575-1591.
- 520 29. Eriguchi Y, Takashima S, Oka H, Shimoji S, Nakamura K, Uryu H, Shimoda S, Iwasaki H, Shimono N, Ayabe T, Akashi K,  
521 Teshima T. 2012. Graft-versus-host disease disrupts intestinal microbial ecology by inhibiting Paneth cell production  
522 of  $\alpha$ -defensins. *Blood* 120:223-31.
- 523 30. Chen J, Huang C, Wang J, Zhou H, Lu Y, Lou L, Zheng J, Tian L, Wang X, Cao Z, Zeng Y. 2017. Dysbiosis of intestinal  
524 microbiota and decrease in paneth cell antimicrobial peptide level during acute necrotizing pancreatitis in rats. *PLoS*  
525 *One* 12:e0176583.
- 526 31. Liu J, Huang L, Luo M, Xia X. 2019. Bacterial translocation in acute pancreatitis. *Crit Rev Microbiol* 45:539-547.
- 527 32. Camargo EA, Santana DG, Silva CI, Teixeira SA, Toyama MH, Cotrim C, Landucci EC, Antunes E, Muscara MN, Costa SK.  
528 2014. Inhibition of inducible nitric oxide synthase-derived nitric oxide as a therapeutic target for acute pancreatitis  
529 induced by secretory phospholipase A2. *Eur J Pain* 18:691-700.
- 530 33. Tian R, Tan JT, Wang RL, Xie H, Qian YB, Yu KL. 2013. The role of intestinal mucosa oxidative stress in gut barrier  
531 dysfunction of severe acute pancreatitis. *Eur Rev Med Pharmacol Sci* 17:349-55.
- 532 34. Zhou C, Fang X, Xu J, Gao J, Zhang L, Zhao J, Meng Y, Zhou W, Han X, Bai Y, Li Z, Zou D. 2020. *Bifidobacterium longum*  
533 alleviates irritable bowel syndrome-related visceral hypersensitivity and microbiota dysbiosis via Paneth cell  
534 regulation. *Gut Microbes* 12:1782156.
- 535 35. Lu R, Zhang YG, Xia Y, Zhang J, Kaser A, Blumberg R, Sun J. 2021. Paneth Cell Alertness to Pathogens Maintained by  
536 Vitamin D Receptors. *Gastroenterology* 160:1269-1283.
- 537 36. Zheng J, Lou L, Fan J, Huang C, Mei Q, Wu J, Guo Y, Lu Y, Wang X, Zeng Y. 2019. Commensal *Escherichia coli* Aggravates  
538 Acute Necrotizing Pancreatitis through Targeting of Intestinal Epithelial Cells. *Appl Environ Microbiol* 85.
- 539 37. Lei Y, Tang L, Liu S, Hu S, Wu L, Liu Y, Yang M, Huang S, Tang X, Tang T, Zhao X, Vlodavsky I, Zeng S, Tang B, Yang S. 2021.  
540 *Parabacteroides* produces acetate to alleviate heparanase-exacerbated acute pancreatitis through reducing  
541 neutrophil infiltration. *Microbiome* 9:115.
- 542 38. Li X, He C, Li N, Ding L, Chen H, Wan J, Yang X, Xia L, He W, Xiong H, Shu X, Zhu Y, Lu N. 2020. The interplay between  
543 the gut microbiota and NLRP3 activation affects the severity of acute pancreatitis in mice. *Gut Microbes* 11:1774-  
544 1789.
- 545 39. Sun D, Bai R, Zhou W, Yao Z, Liu Y, Tang S, Ge X, Luo L, Luo C, Hu GF, Sheng J, Xu Z. 2021. Angiogenin maintains gut  
546 microbe homeostasis by balancing  $\alpha$ -Proteobacteria and Lachnospiraceae. *Gut* 70:666-676.
- 547 40. Wang L, Fouts DE, Stärkel P, Hartmann P, Chen P, Llorente C, DePew J, Moncera K, Ho SB, Brenner DA, Hooper LV,  
548 Schnabl B. 2016. Intestinal REG3 Lectins Protect against Alcoholic Steatohepatitis by Reducing Mucosa-Associated  
549 Microbiota and Preventing Bacterial Translocation. *Cell Host Microbe* 19:227-39.
- 550 41. Laible NJ, Germaine GR. 1985. Bactericidal activity of human lysozyme, muramidase-inactive lysozyme, and cationic

551 polypeptides against *Streptococcus sanguis* and *Streptococcus faecalis*: inhibition by chitin oligosaccharides. *Infect*  
552 *Immunol* 48:720-8.

553 42. Ellison RT, 3rd, Giehl TJ. 1991. Killing of gram-negative bacteria by lactoferrin and lysozyme. *J Clin Invest* 88:1080-91.

554 43. Ragland SA, Criss AK. 2017. From bacterial killing to immune modulation: Recent insights into the functions of  
555 lysozyme. *PLoS Pathog* 13:e1006512.

556 44. Yu S, Balasubramanian I, Laubitz D, Tong K, Bandyopadhyay S, Lin X, Flores J, Singh R, Liu Y, Macazana C, Zhao Y,  
557 Béguet-Crespel F, Patil K, Midura-Kiela MT, Wang D, Yap GS, Ferraris RP, Wei Z, Bonder EM, Häggblom MM, Zhang L,  
558 Douard V, Verzi MP, Cadwell K, Kiela PR, Gao N. 2020. Paneth Cell-Derived Lysozyme Defines the Composition of  
559 Mucolytic Microbiota and the Inflammatory Tone of the Intestine. *Immunity* 53:398-416.e8.

560 45. Gao JJ, Zhang Y, Gerhard M, Mejias-Luque R, Zhang L, Vieth M, Ma JL, Bajbouj M, Suchanek S, Liu WD, Ulm K, Quante  
561 M, Li ZX, Zhou T, Schmid R, Classen M, Li WQ, You WC, Pan KF. 2018. Association Between Gut Microbiota and  
562 *Helicobacter pylori*-Related Gastric Lesions in a High-Risk Population of Gastric Cancer. *Front Cell Infect Microbiol*  
563 8:202.

564 46. Corbin AL, Gomez-Vazquez M, Berthold DL, Attar M, Arnold IC, Powrie FM, Sansom SN, Udalova IA. 2020. IRF5 guides  
565 monocytes toward an inflammatory CD11c(+) macrophage phenotype and promotes intestinal inflammation. *Sci*  
566 *Immunol* 5.

567 47. Zhu L, Zhu C, Cao S, Zhang Q. 2021. *Helicobacter hepaticus* Induce Colitis in Male IL-10(-/-) Mice Dependent by  
568 Cytolethal Distending Toxin B and via the Activation of Jak/Stat Signaling Pathway. *Front Cell Infect Microbiol*  
569 11:616218.

570 48. Alavi S, Mitchell JD, Cho JY, Liu R, Macbeth JC, Hsiao A. 2020. Interpersonal Gut Microbiome Variation Drives  
571 Susceptibility and Resistance to Cholera Infection. *Cell* 181:1533-1546.e13.

572 49. Mullish BH, McDonald JAK, Pechlivanis A, Allegretti JR, Kao D, Barker GF, Kapila D, Petrof EO, Joyce SA, Gahan CGM,  
573 Glegola-Madejska I, Williams HRT, Holmes E, Clarke TB, Thursz MR, Marchesi JR. 2019. Microbial bile salt hydrolases  
574 mediate the efficacy of faecal microbiota transplant in the treatment of recurrent *Clostridioides difficile* infection.  
575 *Gut* 68:1791-1800.

576 50. Wolf AJ, Arruda A, Reyes CN, Kaplan AT, Shimada T, Shimada K, Arditi M, Liu G, Underhill DM. 2011. Phagosomal  
577 degradation increases TLR access to bacterial ligands and enhances macrophage sensitivity to bacteria. *J Immunol*  
578 187:6002-10.

579 51. Caruso R, Warner N, Inohara N, Núñez G. 2014. NOD1 and NOD2: signaling, host defense, and inflammatory disease.  
580 *Immunity* 41:898-908.

581 52. Zhang Q, Pan Y, Yan R, Zeng B, Wang H, Zhang X, Li W, Wei H, Liu Z. 2015. Commensal bacteria direct selective cargo  
582 sorting to promote symbiosis. *Nat Immunol* 16:918-26.

583 53. Wang H, Zhang X, Zuo Z, Zhang Q, Pan Y, Zeng B, Li W, Wei H, Liu Z. 2017. Rip2 Is Required for Nod2-Mediated  
584 Lysozyme Sorting in Paneth Cells. *J Immunol* 198:3729-3736.

585 54. Lee M, Kovacs-Nolan J, Yang C, Archbold T, Fan MZ, Mine Y. 2009. Hen egg lysozyme attenuates inflammation and  
586 modulates local gene expression in a porcine model of dextran sodium sulfate (DSS)-induced colitis. *J Agric Food*  
587 *Chem* 57:2233-40.

588 55. Tan SH, Phuah P, Tan LT, Yada S, Goh J, Tomaz LB, Chua M, Wong E, Lee B, Barker N. 2021. A constant pool of Lgr5(+)  
589 intestinal stem cells is required for intestinal homeostasis. *Cell Rep* 34:108633.

590 56. Wu H, Xie S, Miao J, Li Y, Wang Z, Wang M, Yu Q. 2020. *Lactobacillus reuteri* maintains intestinal epithelial regeneration  
591 and repairs damaged intestinal mucosa. *Gut Microbes* 11:997-1014.

- 592 57. Laukkarinen JM, Van Acker GJ, Weiss ER, Steer ML, Perides G. 2007. A mouse model of acute biliary pancreatitis  
593 induced by retrograde pancreatic duct infusion of Na-taurocholate. *Gut* 56:1590-8.
- 594 58. Mei QX, Hu JH, Huang ZH, Fan JJ, Huang CL, Lu YY, Wang XP, Zeng Y. 2021. Pretreatment with chitosan oligosaccharides  
595 attenuate experimental severe acute pancreatitis via inhibiting oxidative stress and modulating intestinal  
596 homeostasis. *Acta Pharmacol Sin* 42:942-953.
- 597 59. Shimizu T, Shiratori K, Sawada T, Kobayashi M, Hayashi N, Saotome H, Keith JC. 2000. Recombinant human interleukin-  
598 11 decreases severity of acute necrotizing pancreatitis in mice. *Pancreas* 21:134-40.
- 599 60. Chiu CJ, McArdle AH, Brown R, Scott HJ, Gurd FN. 1970. Intestinal mucosal lesion in low-flow states. I. A morphological,  
600 hemodynamic, and metabolic reappraisal. *Arch Surg* 101:478-83.
- 601 61. Liu L, Guo Y, Zheng J, Lu Y, Shen Y, Huang C, Zeng Y, Wang X. 2019. Paneth cell ablation increases the small intestinal  
602 injury during acute necrotizing pancreatitis in rats. *Mol Med Rep* 20:473-484.

603

604

605

606

607

608 Figure 1. AP patients and experimental AP mice presented Paneth cells defect. (A) Histopathological  
609 changes and mean number of Paneth cells per crypt of duodenal mucosa specimens were assessed by HE  
610 staining. Original magnification, 200× (n=7-14 individuals per group). (B) Lysozyme expression (green)  
611 was assessed in Paneth cells of duodenal mucosa specimens by immunofluorescence (200× magnification)  
612 and lysozyme+/DAPI+ quantification. The mRNA expression of (C) lysozyme, (D) HD6, (E) HD5, (F)  
613 Reg3γ, (G) Ang4, (H) sPLA2, (I) TGFβ, (J) Wnt3a and (K) Lgr5 were assessed. (L) Lysozyme expression  
614 (green) (200× magnification) and lysozyme+/DAPI+ quantification of three AP models. (M) Mean number  
615 of Paneth cells per crypt in AP models. The data are presented as the means ± SD; ns, no significant  
616 difference; \*  $p \leq 0.05$ .

617 Figure 2. Long term reduction of Paneth cell aggravated AP-induced pancreatic and ileal injuries and

618 inflammation. (A) Pancreatic histopathological changes of AP mice with or without dithizone treatment.  
619 Original magnification, 100× (the upper figures) or 200× (the lower figures) (n=6 mice per group). (B)  
620 The mRNA expression of TNF- $\alpha$ , IL-6 and IL-1 $\beta$ . (C) Level of serum amylase. (D) Level of pancreatic  
621 edema. (E) Ileal histopathological changes. Original magnification, 200× (the upper figures) or 400× (the  
622 lower figures) (n=6 mice per group). (F-K) Ileal and serum levels of TNF- $\alpha$ , IL-6 and IL-1 $\beta$ . (L) Tunel  
623 staining of small intestines (200× magnification) and Tunel+/DAPI+ quantification. The data are presented  
624 as the means  $\pm$  SD; ns, no significant difference; \*  $p \leq 0.05$ .

625 Figure 3. Long term reduction of Paneth cell increased intestinal permeability. Images of ileal (A) claudin1,  
626 (B) ZO-1, (C) occludin immunofluorescence (200× magnification) and (D) corresponding cellular  
627 quantification (n=6 mice per group). Levels of (E) serum DAO and D-lactate. The mRNA expression of  
628 (F) Wnt3a, (G) TGF $\beta$  and (H) Lgr5. (I) Expression and quantification of intestinal Lgr5. (J)  
629 Immunofluorescence staining and quantification of PCNA (200× magnification). The data are presented  
630 as the means  $\pm$  SD; ns, no significant difference; \*  $p \leq 0.05$ .

631 Figure 4. Long term reduction of Paneth cell aggravated AP-induced bacterial translocation. (A) Levels of  
632 serum endotoxin. (B-E) Representative fluorescent photographs of pancreas (100× magnification) and  
633 ileum (200× magnification) and EUB338+/DAPI+ quantification. (n=6 mice per group). Colony-forming  
634 units (CFUs) were counted on anaerobic culture plates of (F) liver and (G) mesenteric lymph nodes (MLN).  
635 The data are presented as the means  $\pm$  SD; ns, no significant difference; \*  $p \leq 0.05$ .

636 Figure 5. The disturbance of intestinal microbiota was related to the exacerbation of AP. Representative  
637 images of histopathological changes in (A) pancreas, 100× (the upper figures) or 200× (the lower figures)  
638 and (B) ileum, 200× (the upper figures) or 400× (the lower figures) of ABX mice receiving FMT (n=6



639 mice per group). The mRNA expression of TNF- $\alpha$ , IL-6 and IL-1 $\beta$  in (C) pancreas and (D) ileum. (E)  
640 Principal coordinate analysis (PCoA) (n=4-6 mice per group) of the microbial communities. Alpha  
641 diversity, as revealed by (F) chao1 index, (G) ~~shannon~~-Shannon index and (H) ~~simpson~~-Simpson index  
642 was analyzed in Con and Dith mice with or without AP. (I, J) Relative abundance of top five phyla in Con  
643 and Dith mice with or without AP. The data are presented as the means  $\pm$  SD; ns, no significant difference;  
644 \*  $p \leq 0.05$ .

645 Figure 6. Changes of gut microbiota in genus level. (A) Linear discriminant analysis (LDA) scores at the  
646 genus level between Con and Dith mice. (B) LDA scores at the genus level between AP and Dith+AP mice.  
647 (C) Heatmap showed a correlation between intestinal barrier dysfunction, pathological changes,  
648 inflammation cytokines and gut microbiota. Blue means negative correlation, red means positive  
649 correlation. The data are presented as the means  $\pm$  SD; ns, no significant difference; \*  $p \leq 0.05$ .

650 Figure 7. Lysozyme ameliorated the severity of AP and prevented bacterial translocation. (A)  
651 Representative pancreatic sections after H&E staining. Original magnification, 100 $\times$  (the upper figures)  
652 or 200 $\times$  (the lower figures) (n=6 mice per group). (B) Level of serum amylase. (C) Tunel staining and  
653 Tunel+/DAPI+ quantification of apoptosis in the pancreas (100 $\times$  magnification). (D) Level of pancreatic  
654 edema. (E) The level of TNF- $\alpha$ , IL-6 and IL-1 $\beta$  in the pancreas. (F) Representative ileal sections after  
655 H&E staining. Original magnification, 200 $\times$  (the upper figures) or 400 $\times$  (the lower figures). (G) Tunel  
656 staining and Tunel+/DAPI+ quantification of apoptosis in small intestines (200 $\times$  magnification). (H) Ileal  
657 and serum levels of TNF- $\alpha$ , IL-6 and IL-1 $\beta$ . The data are presented as the means  $\pm$  SD; ns, no significant  
658 difference; \*  $p \leq 0.05$ .

659 Figure 8. Lysozyme prevented bacterial translocation. (A) The mRNA expression of TGF $\beta$  and Wnt3a. (B)

660 The mRNA and protein expression of Lgr5. (C) Immunofluorescence staining and quantification of PCNA  
661 (200× magnification). Levels of serum (D) endotoxin, (E) DAO and (F) D-lactate. FISH test of (G)  
662 pancreas (100× magnification) and (H) intestinal epithelium (200× magnification) using EUB338 probe.  
663 EUB338+/DAPI+ was quantified. CFUs were counted on anaerobic culture plates of (I) liver and (J) MLN.  
664 The data are presented as the means ± SD; ns, no significant difference; \*  $p \leq 0.05$ .

665 Figure 9. Lysozyme restored microbiota disorders induced by dysfunction of Paneth cells. (A)  
666 Representative photographs of HE staining in pancreas of ABX mice receiving FMT (n=6 mice per group).  
667 (B) Level of amylase. (C) Representative photographs of HE staining in the ileum of ABX mice receiving  
668 FMT (n=6 mice per group). The mRNA expression of TNF- $\alpha$ , IL-6 and IL-1 $\beta$  in (D) pancreas and (E)  
669 ileum. (F) Principal coordinate analysis (PCoA) of bacterial beta-beta-diversity (n=4-6 mice per group).  
670 (G-I) Alpha diversity analysis using chao1 index, shannon-Shannon index and simpson-Simpson index. (J)  
671 Relative abundance of top five phyla in Dith+AP mice and Lyz+Dith+AP mice. (K) LDA scores at the  
672 genus level between Dith+AP mice and Lyz+Dith+AP mice. The data are presented as the means ± SD;  
673 ns, no significant difference; \*  $p \leq 0.05$

674 Figure 10. Lysozyme promoted enteroid proliferation.(A) Light microscope photographs showed normal  
675 morphology and sizes of enteroids in Lyz group compared to that in Con group. (B) Mean surface area of  
676 enteroids was estimated at 1 day, 2 day, 3 day after incubating with lysozyme. (C) Crypt domains per  
677 enteroid were counted. (D) Representative images of fluorescence staining of PCNA (green) of enteroids  
678 after incubating with lysozyme and LPS. ~~Expression~~The expression of PCNA was quantified. (E) The  
679 mRNA expression of Lgr5. (F) Image of western blot and protein quantification of Lgr5, occludin,  
680 claudin1,  $\beta$ -catenin, Wnt3a and c-myc. The mRNA expression of (G) Wnt3a, (H) TGF $\beta$ ,  $\beta$ -catenin and c-

681 myc. (I) Representative images of fluorescence staining of lysozyme (green) of enteroids. Expression of  
682 lysozyme was quantified. (J) The mRNA expression of TNF- $\alpha$ , IL-6 and IL-1 $\beta$  of enteroids after incubating  
683 with lysozyme and LPS. The data are presented as the means  $\pm$  SD; ns, no significant difference; \*  $p \leq$   
684 0.05.

685 Figure S1. Dysfunction of Paneth cells was revealed by the mRNA expression of (A) Defa5, lysozyme,  
686 sPLA2, Reg3 $\gamma$ , (B) Lgr5, Wnt3a and TGF $\beta$  in three different models of AP. The data are presented as the  
687 means  $\pm$  SD; ns, no significant difference; \*  $p \leq$  0.05.

688 Figure S2. The establishment of long term reduction of Paneth cells. (A) Experimental design. Black  
689 arrows represent dithizone treatments, red arrows represented induction of AP. (B) Representative ileal  
690 immunofluorescence photographs of lysozyme (green) at different time points (200 $\times$  magnification).  
691 Lysozyme+/DAPI+ was also measured at different time points. (C) Mean number of Paneth cells per crypt  
692 at different time points. The mRNA expression of (D) Defa5 and (F) lysozyme at different time points.  
693 The data are presented as the means  $\pm$  SD; \*  $p \leq$  0.05.

694 Figure S3. (A) *Firmicutes/Bacteroidetes* (F/B) ratio in AP mice and Dith mice with or without AP. (B) F/B  
695 ratio in Dith+AP mice and Lyz+Dith+AP mice. (C) Levels of common species in *Helicobacter.spp* and  
696 *Blautia.spp*. The data are presented as the means  $\pm$  SD; ns, no significant difference; \*  $p \leq$  0.05.

697 Figure S4. In Dith mice with or without AP, (A) the mRNA expression of ileal lysozyme, Defa5, Reg3 $\gamma$ ,  
698 MMP7, Reg3 $\beta$ , Ang4, sPLA2 and cryptdin1 were assessed by real time PCR and (B) proteins expression  
699 of ileal lysozyme, sPLA2, Reg3 $\gamma$ , Ang4 and Defa5 were assessed by western blot. (C) Heatmap showed a  
700 correlation between relative expression of AMPs and levels of proinflammatory factors. Blue means  
701 negative correlation, red means positive correlation. In Dith+AP mice with or without AP,

702 immunofluorescence staining of (D) claudin1, (E) ZO-1 and (F) occludin (green) (200× magnification)  
703 and (G) quantification of fluorescence were shown. The data are presented as the means ± SD; ns, no  
704 significant difference; \*  $p \leq 0.05$ .

705 Figure S5. The mRNA expression of (A) lysozyme, (B) Defa5, (C) Reg3 $\gamma$  and (D) Ang4 were carried out  
706 to evaluate intestinal permeability. The data are presented as the means ± SD; ns, no significant difference;  
707 \*  $p \leq 0.05$ .

708 Figure S6. The protein quantification of (A) lysozyme, Reg3 $\gamma$ , sPLA2, Ang4, Defa5, (B) Lgr5, Wnt3a,  $\beta$ -  
709 catenin, c-myc, occludin and claudin1 were carried out to evaluate protein expression. The data are  
710 presented as the means ± SD; ns, no significant difference; \*  $p \leq 0.05$ .

711 Figure S7. Original blot images of all quantification of western blot. (A) Lgr5, (B) Lgr5, (C) Lgr5, occludin  
712 and claudin1, (D)  $\beta$ -catenin and Wnt3a, (E) c-myc, (F) Ang4 and Defa5, (G) lysozyme, (H) Reg3 $\gamma$ , (I)  
713 sPLA2.

714 Table S1. Clinical and demographic characteristics of AP patients.

715 Table S2. The sequences of the primers used in this study.

Reviewer #1 (Comments for the Author):

The authors have sufficiently:

1. Applied correct analytical models to study statistical differences in cellular populations.
- 2) Added new novel data in relation to their study to look at *Heliobacter* sp. opening up new avenues of study.
- 3) Outlined limitations owing to technical and funding limitations, which is a part of ongoing science.

The authors have therefore sufficiently addressed my concerns. Any typographical errors including syntax, missing references, and grammatical deficiencies can be handled by the handling editor and typesetting editors of this journal.

Reviewer #2 (Comments for the Author):

The reviewer carefully read the responses to the review comment and the revised manuscript. All concerns have been addressed and it is acceptable for publication. Congratulations!

**We gratefully thank the reviewers for the time and effort that they have put into reviewing the previous version of the manuscript.**

Reviewer #3 (Comments for the Author):

The authors have taken enough care to improve the manuscript by providing the required information. However, there are minor grammatic errors that need to be taken into consideration. The changes are highlighted in the manuscript (pdf version).

**We thank the distinguished reviewer for careful review of our revision. In revised manuscript, we have corrected all grammatic errors you mentioned. All changes are highlighted by yellow.**

April 8, 2022

Dr. Yue Zeng  
Shanghai General Hospital, Shanghai JiaoTong University School of Medicine  
Shanghai  
China

Re: mSystems01507-21R2 (Paneth cells protect against acute pancreatitis via modulating gut microbiota dysbiosis)

Dear Dr. Yue Zeng:  
Thank you for submitting your manuscript to mSystems.

I am pleased to inform you that your manuscript has been accepted, and I am forwarding it to the ASM Journals Department for publication. For your reference, ASM Journals' address is given below. Before it can be scheduled for publication, your manuscript will be checked by the mSystems production staff to make sure that all elements meet the technical requirements for publication. They will contact you if anything needs to be revised before copyediting and production can begin. Otherwise, you will be notified when your proofs are ready to be viewed.

ASM policy requires that data be available to the public upon online posting of the article, so please verify all links to sequence records, if present, and make sure that each number retrieves the full record of the data. If a new accession number is not linked or a link is broken, provide production staff with the correct URL for the record. If the accession numbers for new data are not publicly accessible before the expected online posting of the article, publication of your article may be delayed; please contact the ASM production staff immediately with the expected release date.

As an open-access publication, mSystems receives no financial support from paid subscriptions and depends on authors' prompt payment of publication fees as soon as their articles are accepted.

**Publication Fees:**

You will be contacted separately about payment when the proofs are issued; please follow the instructions in that e-mail. Arrangements for payment must be made before your article is published. For a complete list of **Publication Fees**, including supplemental material costs, please visit our [website](#).

Corresponding authors may [join or renew ASM membership](#) to obtain discounts on publication fees. Need to upgrade your membership level? Please contact Customer Service at [Service@asmusa.org](mailto:Service@asmusa.org).

**For mSystems research articles**, you are welcome to submit a short author video for your recently accepted paper. Videos are normally 1 minute long and are a great opportunity for junior authors to get greater exposure. Importantly, this video will not hold up the publication of your paper, and you can submit it at any time.

Details of the video are:

- Minimum resolution of 1280 x 720
- .mov or .mp4. video format
- Provide video in the highest quality possible, but do not exceed 1080p
- Provide a still/profile picture that is 640 (w) x 720 (h) max
- Provide the script that was used

We recognize that the video files can become quite large, and so to avoid quality loss ASM suggests sending the video file via <https://www.wetransfer.com/>. When you have a final version of the video and the still ready to share, please send it to mSystems staff at [mSystems@asmusa.org](mailto:mSystems@asmusa.org).

**For mSystems research articles**, if you would like to submit an image for consideration as the Featured Image for an issue, please contact mSystems staff at [mSystems@asmusa.org](mailto:mSystems@asmusa.org).

Thank you for submitting your paper to mSystems.

Sincerely,

Chaysavanh Manichanh  
Editor, mSystems

Journals Department  
American Society for Microbiology  
1752 N St., NW  
Washington, DC 20036  
E-mail: [peerreview@asmusa.org](mailto:peerreview@asmusa.org)  
Phone: (202) 737-3600

Fig. S7: Accept  
Fig. S6: Accept  
Fig. S3: Accept  
Fig. S4: Accept  
Fig. S1: Accept  
Table S1: Accept  
Table S2: Accept  
Fig. S5: Accept  
Fig. S2: Accept
